# Supplementary material
Source: PubMed Central journal article supplement (PMC6857804)
Supplement: NIHMS1057272-supplement-Table_S01.pdf [file NIHMS1057272-supplement-Table_S01.pdf]

Supplementary Table 1 Characteristics of NF1-glioma cohort.

| Case ID | Age     | Gender | Diagnosis                        | Grade | Matched Normal (Blood) | NF1 germline mutation | chrX Tumor Ploidy | WES | RNaseq | DNA Meth |
|---------|---------|--------|----------------------------------|-------|------------------------|-----------------------|-------------------|-----|--------|----------|
| 1       | 22      | Female | Anaplastic xanthoastrocytoma     | III   | no                     | YES *                 | 1.92              | YES | YES    | YES      |
| 3       | 39      | Male   | Glioblastoma multiforme          | IV    | YES                    | YES                   | 1.03              | YES | YES    | YES      |
| 4       | 20      | Male   | Anaplastic astrocytoma           | III   | YES                    | YES                   | 1.41              | YES | YES    | no       |
| 5       | 34      | Male   | Anaplastic ganglioglioma         | III   | YES                    | YES                   | 1.01              | YES | YES    | YES      |
| 6       | 22      | Female | Pilocytic astrocytoma            | I     | YES                    | YES                   | 1.88              | YES | no     | YES      |
| 7       | 42      | Male   | Glioblastoma multiforme          | IV    | YES                    | YES                   | 1.36              | YES | YES    | YES      |
| 8       | 57      | Male   | Pilocytic astrocytoma            | I     | YES                    | no                    | 1.02              | YES | no     | YES      |
| 9       | 43      | Female | Pilocytic astrocytoma            | I     | YES                    | YES                   | 1.84              | YES | no     | no       |
| 10      | 40      | Male   | Ganglioglioma                    | II    | YES                    | YES                   | 1.35              | YES | no     | YES      |
| 11      | 26      | Female | Xanthoastrocytoma                | II    | YES                    | YES                   | 1.99              | YES | YES    | YES      |
| 12      | 20      | Male   | Ganglioglioma                    | II    | YES                    | YES                   | 1.03              | YES | YES    | YES      |
| 13      | 32      | Female | Xanthoastrocytoma                | II    | YES                    | YES                   | 1.73              | YES | YES    | YES      |
| 14      | 56      | Male   | Anaplastic astrocytoma           | III   | YES                    | no                    | 1.02              | YES | YES    | YES      |
| 15      | 5       | Female | Optic pathway glioma             | II    | YES                    | YES                   | 1.99              | YES | YES    | no       |
| 16      | 15      | Female | Pilocytic astrocytoma            | I     | YES                    | YES                   | 1.83              | YES | YES    | YES      |
| 17      | 11      | Male   | Pilocytic astrocytoma            | I     | YES                    | YES                   | 0.94              | YES | YES    | YES      |
| 19      | 26      | Male   | Glioblastoma multiforme          | IV    | YES                    | YES                   | 1.00              | YES | no     | YES      |
| 20      | 18      | Male   | Glioblastoma multiforme          | IV    | YES                    | YES                   | 1.28              | YES | no     | YES      |
| 21      | unknown | Female | Glioblastoma multiforme          | IV    | YES                    | YES                   | 1.93              | YES | no     | YES      |
| 22      | 11      | Female | Pilocytic astrocytoma            | I     | YES                    | YES                   | 1.89              | YES | no     | YES      |
| 23      | 2       | Male   | Glioblastoma multiforme          | IV    | YES                    | YES                   | 1.40              | YES | no     | YES      |
| 24      | 2       | Female | Pilocytic astrocytoma            | I     | YES                    | no                    | 1.92              | YES | no     | no       |
| 27      | 10      | Female | Pilocytic astrocytoma            | I     | YES                    | YES                   | 1.81              | YES | no     | no       |
| 28      | 10      | Male   | Pilocytic astrocytoma            | I     | YES                    | YES                   | 1.01              | YES | no     | no       |
| 29      | 11      | Female | Pilocytic astrocytoma            | I     | YES                    | YES                   | 2.02              | YES | no     | no       |
| 30      | 11      | Male   | Anaplastic astrocytoma           | III   | YES                    | YES                   | 1.02              | YES | no     | no       |
| 31      | 40      | Female | Anaplastic astrocytoma           | III   | YES                    | YES                   | 1.90              | YES | YES    | YES      |
| 32      | 18      | Female | Pilocytic astrocytoma            | I     | no                     | YES *                 | 1.81              | YES | YES    | YES      |
| 33      | 15      | Female | Pilocytic astrocytoma            | I     | YES                    | no                    | 1.99              | YES | YES    | YES      |
| 34      | 38      | Female | Glioblastoma multiforme          | IV    | no                     | YES *                 | 1.99              | YES | no     | YES      |
| 35      | 37      | Male   | Xanthoastrocytoma                | II    | no                     | YES *                 | 1.17              | YES | YES    | YES      |
| 36      | 15      | Female | Ganglioglioma                    | II    | no                     | YES *                 | 2.01              | YES | YES    | YES      |
| 37      | 7       | Female | High-grade glioma                | III   | no                     | YES *                 | 2.05              | YES | no     | YES      |
| 38      | 18      | Male   | Ganglioglioma                    | I     | no                     | YES *                 | 0.97              | YES | YES    | YES      |
| 39**    | 34      | Male   | Pilocytic astrocytoma            | I     | YES                    | YES                   | 0.90              | YES | YES    | no       |
| 42      | 20      | Female | Pilocytic astrocytoma            | I     | YES                    | YES                   | 1.65              | YES | YES    | no       |
| 43      | 23      | Female | Pilocytic astrocytoma            | I     | YES                    | YES                   | 1.71              | YES | YES    | no       |
| 44      | 25      | Female | Anaplastic astrocytoma           | III   | YES                    | YES                   | 2.02              | YES | no     | no       |
| 46      | 9       | Female | Low-grade calcifying astrocytoma | II    | YES                    | YES                   | 2.05              | YES | no     | no       |
| 47      | 14      | Male   | Pilocytic astrocytoma            | I     | YES                    | YES                   | 1.05              | YES | no     | no       |
| 48      | 7       | Female | Pilocytic astrocytoma            | I     | YES                    | YES                   | 2.02              | YES | YES    | no       |
| 49      | 11      | Female | Glioblastoma multiforme          | IV    | YES                    | YES                   | 1.81              | YES | no     | no       |
| 51      | 63      | Male   | Glioblastoma multiforme          | IV    | YES                    | YES                   | 1.22              | YES | no     | no       |
| 52      | 9       | Female | Pilocytic astrocytoma            | I     | YES                    | YES                   | 1.94              | YES | YES    | no       |
| 53      | 3       | Male   | Optic pathway glioma             | I     | YES                    | YES                   | 1.02              | YES | YES    | no       |
| 55      | 40      | Female | Glioblastoma multiforme          | IV    | YES                    | no                    | 2.11              | YES | no     | no       |
| 56      | 13      | Female | Glioblastoma multiforme          | IV    | YES                    | YES                   | 1.43              | YES | YES    | no       |
| 57      | 42      | Male   | Glioblastoma multiforme          | IV    | YES                    | YES                   | 1.14              | YES | no     | no       |
| 60      | 9       | Female | Diffuse glioma                   | II    | no                     | YES *                 | 1.88              | YES | no     | YES      |
| 61      | 18      | Female | Anaplastic diffuse glioma        | III   | no                     | YES *                 | 1.98              | YES | YES    | YES      |
| 63      | 40      | Female | Glioblastoma multiforme          | IV    | no                     | YES *                 | 2.00              | YES | YES    | no       |
| 64      | 42      | Female | Anaplastic astrocytoma           | III   | no                     | YES *                 | 2.07              | YES | no     | YES      |
| 65      | 38      | Female | Ganglioglioma                    | I     | no                     | YES *                 | 1.79              | YES | YES    | no       |
| 66      | 3       | Female | Pilocytic astrocytoma            | I     | YES                    | YES                   | 2.04              | YES | YES    | YES      |
| 67      | 23      | Male   | Pilocytic astrocytoma            | I     | YES                    | YES                   | 1.06              | YES | no     | YES      |
| 70      | 45      | Male   | Gliosarcoma                      | IV    | no                     | YES *                 | 1.25              | YES | no     | no       |

\*NF1 germline mutation inferred from tumor DNA analysis.

\*\*Four different biopsies of the same tumor were available for patient no. 39 (these are reported as 39.1, 39.2, 39.3 and 39.4 in Fig. 2).
