# Supplementary material
Source: PubMed Central journal article supplement (PMC6857804)
Supplement: NIHMS1057272-supplement-Table_S03a.pdf [file NIHMS1057272-supplement-Table_S03a.pdf]

Supplementary Table 3 NF1 germline and somatic mutations.  
 Supplementary Table 4 NF1 germline and somatic mutations identified in patients with matched blood DNA available.

| NF1 GERMLINE MUTATIONS |      |     |          |          |      |     |            |                  |            |           |                                  |                |                   |             |          |                           |                                 |                    |                    |                 |               |                                       |                       |                       |                     |                     |                  |               |       |
|------------------------|------|-----|----------|----------|------|-----|------------|------------------|------------|-----------|----------------------------------|----------------|-------------------|-------------|----------|---------------------------|---------------------------------|--------------------|--------------------|-----------------|---------------|---------------------------------------|-----------------------|-----------------------|---------------------|---------------------|------------------|---------------|-------|
| Case ID                | Type | Chr | Start    | End      | Ref  | Alt | Function   | Effect           | Normal VAF | Tumor VAF | Tumor VAF (normalized by purity) | Tumor Genotype | Sanger Validation | ClinVar ID  | HGMD ID  | Pathogenicity             | Missense Pathogenic Predictions | MutFaster missense | PolyPhen2 missense | Provar missense | SIFT missense | In-frame indel Pathogenic Predictions | FATHMM in-frame indel | Provar in-frame indel | SIFT in-frame indel | VEST in-frame indel | Log odds ratio 1 |               |       |
| 1                      | DEL  | 17  | 29527228 | 29527228 | C    | T   | splicing   | p.29527228C>T    | 0.0        | 0.0       | 0.0                              | DN             | verified          |             |          |                           |                                 |                    |                    |                 |               |                                       |                       |                       |                     |                     |                  |               |       |
| 4                      | DEL  | 17  | 29546266 | 29546267 | AG   | T   | frameshift | p.29546266G>T    | 0.43       | 0.43      | 1.00                             | DN             | verified          | 14817026500 | CS662397 | frameshift                |                                 |                    |                    |                 |               |                                       |                       |                       |                     |                     |                  | 58.64         |       |
| 5                      | DEL  | 17  | 29545141 | 29545146 | AGAC | T   | frameshift | p.29545141G>T    | 0.0        | 0.0       | 0.0                              | DN             | verified          |             |          | frameshift                |                                 |                    |                    |                 |               |                                       |                       |                       |                     |                     |                  | 58.64         |       |
| 6                      | DEL  | 17  | 29564869 | 29564869 | C    | T   | frameshift | p.29564869C>T    | 0.0        | 0.0       | 0.0                              | DN             | verified          |             |          | frameshift                |                                 |                    |                    |                 |               |                                       |                       |                       |                     |                     |                  | 58.64         |       |
| 7                      | SNV  | 17  | 29552277 | 29552277 | G    | C   | splicing   | p.29552277G>C    | 0.46       | 0.4       | 1.00                             | DN             | verified          |             | CS600875 | splicing                  |                                 |                    |                    |                 |               |                                       |                       |                       |                     |                     |                  | 92.67         |       |
| 9                      | SNV  | 17  | 29616116 | 29616116 | A    | G   | splicing   | p.29616116A>G    | 0.46       | 0.38      | 1.00                             | DN             | verified          |             | CS600874 | splicing                  |                                 |                    |                    |                 |               |                                       |                       |                       |                     |                     |                  | 92.76         |       |
| 10                     | SNV  | 17  | 29678364 | 29678364 | C    | T   | frameshift | p.29678364C>T    | 0.75       | 1.00      | 1.00                             | DN             | verified          | 14865446137 | CS641376 | frameshift                |                                 |                    |                    |                 |               |                                       |                       |                       |                     |                     |                  | 45.82         |       |
| 11                     | DEL  | 17  | 29494344 | 29494347 | TCTT | T   | frameshift | p.29494344T>C    | 0.0        | 0.0       | 0.0                              | DN             | verified          | 13786258474 | CS600348 | frameshift                |                                 |                    |                    |                 |               |                                       |                       |                       |                     |                     |                  | 3.79          |       |
| 12                     | DEL  | 17  | 29546048 | 29546048 | C    | T   | frameshift | p.29546048C>T    | 0.0        | 0.0       | 0.0                              | DN             | verified          |             |          | frameshift                |                                 |                    |                    |                 |               |                                       |                       |                       |                     |                     |                  | not available |       |
| 13                     | DEL  | 17  | 29551544 | 29551544 | T    | T   | frameshift | p.29551544T>T    | 0.0        | 0.0       | 0.0                              | DN             | verified          |             |          | frameshift                |                                 |                    |                    |                 |               |                                       |                       |                       |                     |                     |                  | 3.4           |       |
| 15                     | DEL  | 17  | 29543332 | 29543332 | AA   | T   | frameshift | p.29543332A>T    | 0.23       | 0.23      | 1.00                             | DN             | verified          |             |          | frameshift                |                                 |                    |                    |                 |               |                                       |                       |                       |                     |                     |                  | 11.63         |       |
| 18                     | DEL  | 17  | 29544844 | 29544844 | TAC  | T   | frameshift | p.29544844T>C    | 0.23       | 0.23      | 1.00                             | DN             | verified          | 13786258781 | CS621129 | frameshift                |                                 |                    |                    |                 |               |                                       |                       |                       |                     |                     |                  | 19.81         |       |
| 19                     | SNV  | 17  | 29509171 | 29509171 | T    | T   | frameshift | p.29509171T>T    | 0.13       | 0.13      | 1.00                             | DN             | verified          | 13786259305 | CS641379 | frameshift                |                                 |                    |                    |                 |               |                                       |                       |                       |                     |                     |                  | 49.21         |       |
| 20                     | SNV  | 17  | 2954447  | 2954447  | C    | T   | frameshift | p.2954447C>T     | 0.0        | 0.0       | 1.00                             | DN             | verified          | 1481738407  |          | frameshift                |                                 |                    |                    |                 |               |                                       |                       |                       |                     |                     |                  | 87.21         |       |
| 21                     | SNV  | 17  | 2954118  | 2954118  | A    | G   | splicing   | p.2954118A>G     | 0.43       | 0.24      | 1.00                             | DN             | verified          |             |          | frameshift                |                                 |                    |                    |                 |               |                                       |                       |                       |                     |                     |                  | 49.21         |       |
| 21                     | SNV  | 17  | 29588761 | 29588761 | C    | T   | frameshift | p.29588761C>T    | 0.43       | 0.0       | 1.00                             | DN             | verified          | 13786259305 | CS641379 | frameshift                |                                 |                    |                    |                 |               |                                       |                       |                       |                     |                     |                  | 6.83          |       |
| 22                     | SNV  | 17  | 29494028 | 29494028 | T    | T   | splicing   | p.29494028T>T    | 0.0        | 0.0       | 1.00                             | DN             | verified          |             |          | splicing                  |                                 |                    |                    |                 |               |                                       |                       |                       |                     |                     |                  | 28.52         |       |
| 23                     | SNV  | 17  | 29505444 | 29505444 | G    | T   | frameshift | p.29505444G>T    | 0.45       | 0.45      | 1.00                             | DN             | verified          |             |          | frameshift                |                                 |                    |                    |                 |               |                                       |                       |                       |                     |                     |                  | 35.79         |       |
| 27                     | DEL  | 17  | 29543831 | 29543831 | T    | T   | frameshift | p.29543831T>T    | 0.43       | 0.43      | 1.00                             | DN             | verified          |             |          | frameshift                |                                 |                    |                    |                 |               |                                       |                       |                       |                     |                     |                  | 23.29         |       |
| 28                     | SNV  | 17  | 29528178 | 29528178 | G    | A   | splicing   | p.29528178G>A    | 0.39       | 0.38      | 1.00                             | DN             | verified          | 14864127261 | CS600650 | splicing                  |                                 |                    |                    |                 |               |                                       |                       |                       |                     |                     |                  | 28.23         |       |
| 29                     | DEL  | 17  | 2954448  | 2954448  | T    | T   | frameshift | p.2954448T>T     | 0.43       | 0.43      | 1.00                             | DN             | verified          |             |          | frameshift                |                                 |                    |                    |                 |               |                                       |                       |                       |                     |                     |                  | 18.0          |       |
| 30                     | INS  | 17  | 29583369 | 29583369 | AG   | T   | splicing   | p.29583369AG>T   | 0.43       | 0.43      | 1.00                             | DN             | verified          | 13786259305 | CS600651 | splicing                  |                                 |                    |                    |                 |               |                                       |                       |                       |                     |                     |                  | 51.76         |       |
| 31                     | SNV  | 17  | 29585011 | 29585011 | C    | T   | frameshift | p.29585011C>T    | 0.43       | 0.43      | 1.00                             | DN             | verified          |             | CS641385 | frameshift                |                                 |                    |                    |                 |               |                                       |                       |                       |                     |                     |                  | 61.09         |       |
| 39                     | DEL  | 17  | 2959368  | 2959368  | T    | T   | frameshift | p.2959368T>T     | 0.13       | 0.13      | 1.00                             | DN             | verified          |             |          | frameshift                |                                 |                    |                    |                 |               |                                       |                       |                       |                     |                     |                  | 18.5          |       |
| 42                     | SNV  | 17  | 29598778 | 29598778 | C    | A   | frameshift | p.29598778C>A    | 0.47       | 0.47      | 1.00                             | DN             | verified          |             | CS686301 | frameshift                |                                 |                    |                    |                 |               |                                       |                       |                       |                     |                     |                  | 37.20         |       |
| 43                     | SNV  | 17  | 2959524  | 2959524  | T    | A   | frameshift | p.2959524T>A     | 0.29       | 0.29      | 1.00                             | DN             | verified          |             |          | frameshift                |                                 |                    |                    |                 |               |                                       |                       |                       |                     |                     |                  | 49.01         |       |
| 44                     | DEL  | 17  | 2966763  | 2966763  | ACTT | T   | frameshift | p.2966763ACTT>T  | 0.43       | 0.43      | 1.00                             | DN             | verified          | 1486324848  | CS611709 | frameshift                |                                 |                    |                    |                 |               |                                       |                       |                       |                     |                     |                  | 57.60         |       |
| 46                     | SNV  | 17  | 2959596  | 2959596  | A    | A   | frameshift | p.2959596A>A     | 0.2        | 0.2       | 1.00                             | DN             | verified          | 14864747174 | CS686304 | frameshift                |                                 |                    |                    |                 |               |                                       |                       |                       |                     |                     |                  | 193.66        |       |
| 47                     | SNV  | 17  | 2954545  | 2954545  | A    | A   | frameshift | p.2954545A>A     | 0.43       | 0.43      | 1.00                             | DN             | verified          |             | CS600789 | frameshift                |                                 |                    |                    |                 |               |                                       |                       |                       |                     |                     |                  | 17.66         |       |
| 47*                    | SNV  | 17  | 2954683  | 2954683  | TCT  | T   | in-frame   | p.2954683TCT>TCT | 0.4        | 0.4       | 1.00                             | DN             | verified          |             |          | pathogenic in-frame indel |                                 |                    |                    |                 |               |                                       | 3/4                   |                       |                     |                     |                  | 17.66         |       |
| 48                     | SNV  | 17  | 2987502  | 2987502  | T    | C   | missense   | p.2987502T>C     | 0.54       | 0.54      | 1.00                             | DN             | verified          | CS654014    |          | pathogenic missense       |                                 |                    |                    |                 |               |                                       |                       |                       |                     |                     |                  | 67.17         |       |
| 49                     | SNV  | 17  | 2954070  | 2954070  | T    | T   | frameshift | p.2954070T>T     | 0.38       | 0.38      | 1.00                             | DN             | verified          |             | CS611468 | frameshift                |                                 |                    |                    |                 |               |                                       |                       |                       |                     |                     |                  | 11.45         |       |
| 51                     | DEL  | 17  | 2956029  | 2956029  | AA   | T   | frameshift | p.2956029AA>T    | 0.29       | 0.29      | 1.00                             | DN             | verified          |             |          | frameshift                |                                 |                    |                    |                 |               |                                       |                       |                       |                     |                     |                  | 18.0          |       |
| 52*                    | SNV  | 17  | 29527438 | 29527438 | A    | G   | splicing   | p.29527438A>G    | 0.48       | 0.31      | 0.61                             | NS             | verified          | 1487883922  | CS691467 | splicing                  |                                 |                    |                    |                 |               |                                       |                       |                       |                     |                     |                  | 0.00          |       |
| 52*                    | SNV  | 17  | 2969279  | 2969279  | C    | T   | missense   | p.2969279C>T     | 0.13       | 0.13      | 0.61                             | NS             | verified          |             | CS64442  | splicing                  |                                 |                    |                    |                 |               |                                       |                       |                       |                     |                     |                  |               | 72.81 |
| 53                     | SNV  | 17  | 29528204 | 29528204 | G    | T   | splicing   | p.29528204G>T    | 0.13       | 0.13      | 1.00                             | DN             | verified          |             | CS672951 | frameshift                |                                 |                    |                    |                 |               |                                       |                       |                       |                     |                     |                  | 160.68        |       |
| 56                     | DEL  | 17  | 2951818  | 2951818  | TCTC | T   | frameshift | p.2951818TCTC>T  | 0.1        | 0.1       | 0.61                             | NS             | verified          |             |          | frameshift                |                                 |                    |                    |                 |               |                                       |                       |                       |                     |                     |                  | not available |       |
| 57                     | SNV  | 17  | 2931378  | 2931378  | C    | T   | frameshift | p.2931378C>T     | 0.47       | 0.51      | 0.91                             | DN             | verified          | 1487883985  | CS600780 | frameshift                |                                 |                    |                    |                 |               |                                       |                       |                       |                     |                     |                  | 17.66         |       |
| 66                     | SNV  | 17  | 2956545  | 2956545  | A    | G   | splicing   | p.2956545A>G     | 0.13       | 0.0       | 0.61                             | NS             | verified          |             |          | splicing                  |                                 |                    |                    |                 |               |                                       |                       |                       |                     |                     |                  | 17.66         |       |
| 67                     | DEL  | 17  | 2950593  | 2950593  | GG   | T   | frameshift | p.2950593GG>T    | 0.43       | 0.43      | 1.00                             | DN             | verified          |             |          | frameshift                |                                 |                    |                    |                 |               |                                       |                       |                       |                     |                     |                  | 0.00          |       |

| NF1 SOMATIC MUTATIONS |      |     |          |          |       |     |            |                  |           |                   |            |            |                           |                                 |                    |                    |                 |               |                                       |                       |                       |                     |                     |                  |  |  |               |
|-----------------------|------|-----|----------|----------|-------|-----|------------|------------------|-----------|-------------------|------------|------------|---------------------------|---------------------------------|--------------------|--------------------|-----------------|---------------|---------------------------------------|-----------------------|-----------------------|---------------------|---------------------|------------------|--|--|---------------|
| Case ID               | Type | Chr | Start    | End      | Ref   | Alt | Function   | Effect           | Tumor VAF | Sanger Validation | ClinVar    | HGMD       | Pathogenicity             | Missense Pathogenic Predictions | MutFaster missense | PolyPhen2 missense | Provar missense | SIFT missense | In-frame indel Pathogenic Predictions | FATHMM in-frame indel | Provar in-frame indel | SIFT in-frame indel | VEST in-frame indel | Log odds ratio 1 |  |  |               |
| 6                     | DEL  | 17  | 29552277 | 29552277 | C     | T   | frameshift | p.29552277C>T    | 0.0       | verified          |            |            | frameshift                |                                 |                    |                    |                 |               |                                       |                       |                       |                     |                     |                  |  |  | 1.00          |
| 14                    | SNV  | 17  | 2955482  | 2955482  | C     | A   | missense   | p.2955482C>A     | 0.18      | verified          |            |            | pathogenic missense       | 4/4                             |                    |                    |                 |               |                                       |                       |                       |                     |                     |                  |  |  | 3.77          |
| 17                    | INS  | 17  | 2956207  | 2956207  | T     | A   | frameshift | p.2956207T>A     | 0.29      | verified          | 1486041348 |            | frameshift                |                                 |                    |                    |                 |               |                                       |                       |                       |                     |                     |                  |  |  | 12.4          |
| 20                    | INS  | 17  | 2956563  | 2956563  | TCTGT | T   | in-frame   | p.2956563TCTGT>T | 0.29      | verified          |            |            | pathogenic in-frame indel |                                 |                    |                    |                 |               |                                       |                       |                       |                     |                     |                  |  |  | 8.00          |
| 52                    | SNV  | 17  | 2951480  | 2951480  | T     | T   | frameshift | p.2951480T>T     | 0.46      | verified          | 1374678261 |            | frameshift                |                                 |                    |                    |                 |               |                                       |                       |                       |                     |                     |                  |  |  | 0.00          |
| 55                    | DEL  | 17  | 2956480  | 2956480  | T     | T   | frameshift | p.2956480T>T     | 0.1       | verified          |            |            | frameshift                |                                 |                    |                    |                 |               |                                       |                       |                       |                     |                     |                  |  |  | not available |
| 66                    | SNV  | 17  | 2956469  | 2956469  | C     | T   | frameshift | p.2956469C>T     | 0.28      | verified          |            |            | frameshift                |                                 |                    |                    |                 |               |                                       |                       |                       |                     |                     |                  |  |  | 17.66         |
| 67                    | SNV  | 17  | 2952744  | 2952744  | T     | C   | splicing   | p.2952744T>C     | 0.34      | verified          |            | 1374678261 | CS601246                  | frameshift                      |                    |                    |                 |               |                                       |                       |                       |                     |                     |                  |  |  | not available |

\*Samples with two independent NF1 germline mutations.
