# Supplementary material
Source: PubMed Central journal article supplement (PMC6857804)
Supplement: NIHMS1057272-supplement-Table_S04.pdf [file NIHMS1057272-supplement-Table_S04.pdf]

The image shows a full page of graph paper. The grid consists of small squares. A vertical column of squares in the center of the page is shaded gray, extending from the top to the bottom of the grid. The rest of the grid is white with black lines.

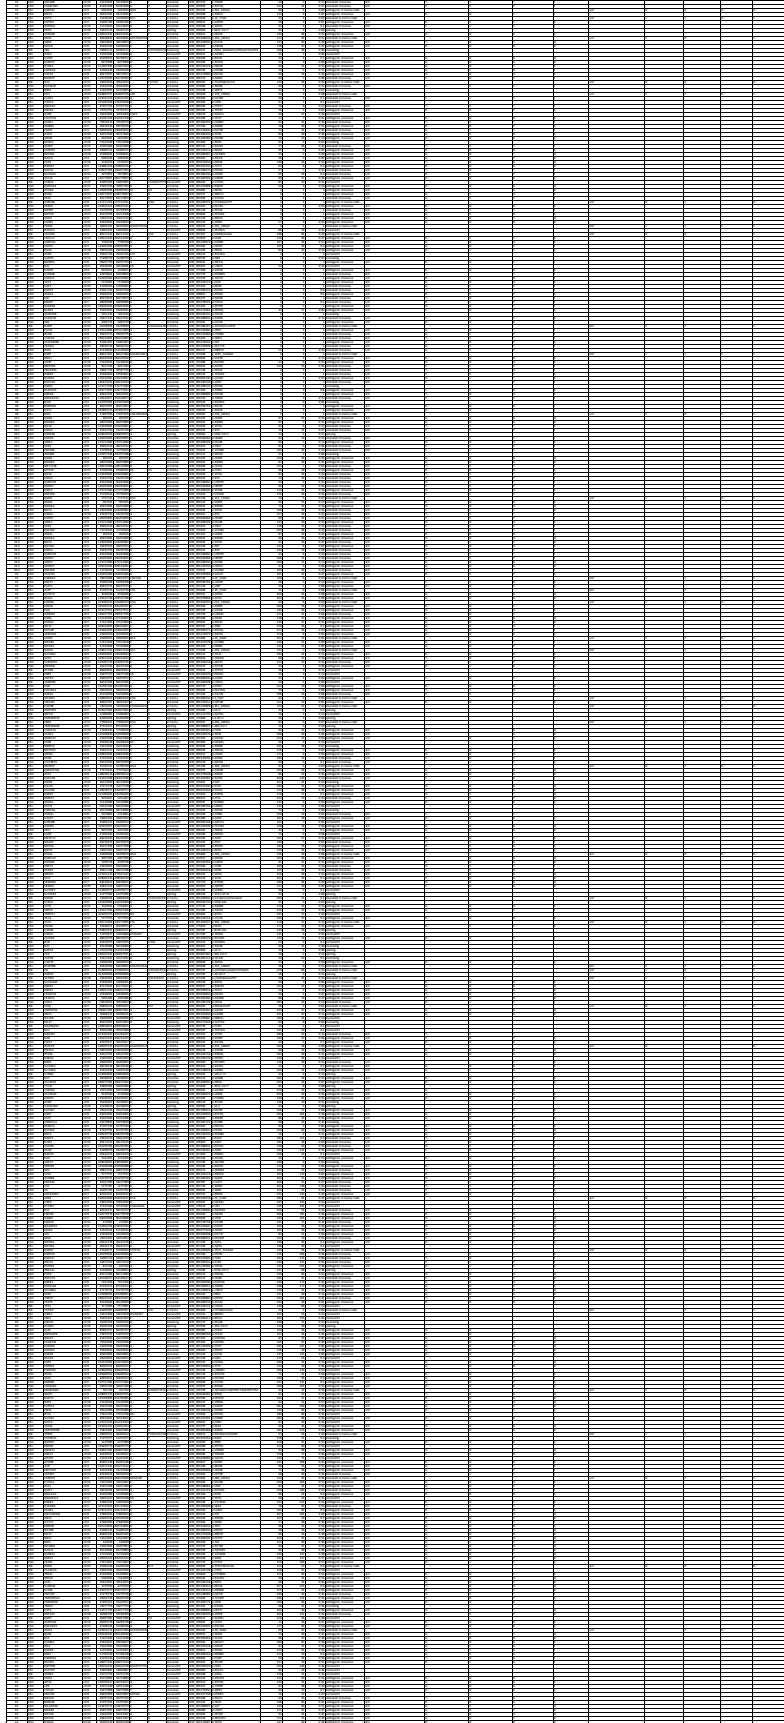

This image shows a large, empty grid table. The table consists of 20 columns and 30 rows, forming a rectangular grid of small cells. The grid is centered on the page and is completely blank, with no text or data entered into any of the cells.
