# Supplementary material
Source: PubMed Central journal article supplement (PMC6857804)
Supplement: NIHMS1057272-supplement-Table_S05.pdf [file NIHMS1057272-supplement-Table_S05.pdf]

Supplementary Table 5 Bi-allelic mutation analysis of *NF1*

| Case ID | Germline <i>NF1</i> mutation | Somatic <i>NF1</i> mutation | gDNA distance (bp) | cDNA distance (bp) | Amplicon size (bp) | Forward                 | Reverse                   | Clones with <i>NF1</i> germline mutation | Clones with <i>NF1</i> somatic mutation |
|---------|------------------------------|-----------------------------|--------------------|--------------------|--------------------|-------------------------|---------------------------|------------------------------------------|-----------------------------------------|
| 17      | p.R1513X                     | p.D888fs                    | 32454              | 1936               | 2539 (cDNA)        | CTGAGGCTTGGGAAGATACAC   | CCATTGATTTGACCAGTTTTGAACC | 10                                       | 12                                      |
| 29      | p.T676fs                     | p.T1245delinsTLS            | 9175               | 1706               | 2311 (cDNA)        | ATGCTCCTGTAGAAACATTTTGG | TCCTCAAGGCTCTCTGATGGTTC   | 12                                       | 12                                      |
| 52      | c.889-2A>G                   | p.R416X                     | 1051               | 357                | 2068 (gDNA)        | GGAGAATCGCTTGACCCCTG    | AGACAGAGTTGAAGGTTTCGC     | 7                                        | 12                                      |
| 67      | p.W267fs                     | p.F1275X                    | 53149              | 3024               | 3423 (cDNA)        | AGCCCTAAAGAAGTTGCG      | GTCTATGAAGGAGGTTCCG       | 3                                        | 7                                       |
