# Supplementary material
Source: PubMed Central journal article supplement (PMC6857804)
Supplement: NIHMS1057272-supplement-Table_S07a.pdf [file NIHMS1057272-supplement-Table_S07a.pdf]

**Supplementary Table 7 Mutual exclusivity and co-occurrence of genetic alterations in NF1-glioma.**

**Supplementary Table 7a Mutual exclusivity of genetic alterations in NF1-glioma.**

| <b>Gene A</b> | <b>Gene B</b> | <b>p-value</b> |
|---------------|---------------|----------------|
| ATRX          | TERT (CN gai  | 2.15E-03       |
| ATRX          | FGF1 (CN ga   | 2.99E-03       |
| CDKN2A (CN    | FGF1 (CN ga   | 1.52E-02       |
| TERT (CN gai  | TP53          | 1.85E-02       |
| FGF1 (CN ga   | TP53          | 2.25E-02       |
| CDKN2A (CN    | TERT (CN gai  | 4.03E-02       |
| ATRX          | CR1 (CN gain  | 4.04E-02       |
