# Supplementary material
Source: PubMed Central journal article supplement (PMC6857804)
Supplement: NIHMS1057272-supplement-Table_S07b.pdf [file NIHMS1057272-supplement-Table_S07b.pdf]

**Supplementary Table 7 Mutual exclusivity and co-occurrence of genetic alterations in NF1-glioma.**

**Supplementary Table 7b Co-occurrence of genetic alterations in NF1-glioma.**

| Gene A        | Gene B        | p-value  |
|---------------|---------------|----------|
| ATRX          | TEX15         | 3.21E-02 |
| ATRX          | PDE1A         | 3.21E-02 |
| ATRX          | CDKN2A (CN    | 2.74E-02 |
| MCM5          | TPRX1         | 1.75E-03 |
| ARHGAP31      | RAI1          | 5.84E-04 |
| ARHGAP31      | BCL9          | 5.84E-04 |
| DSCAM         | LRRIQ1        | 5.84E-04 |
| DSCAM         | MYH2          | 3.51E-03 |
| LRRIQ1        | MYH2          | 3.51E-03 |
| MYH2          | DOCK3         | 3.51E-03 |
| RAI1          | BCL9          | 5.84E-04 |
| FSIP2         | PIK3CA        | 3.51E-03 |
| FSIP2         | KIF1C (CN ga  | 3.51E-03 |
| TCHH          | IL15 (CN gair | 8.80E-03 |
| CACNA2D1      | PHF24         | 5.84E-04 |
| DGKQ          | MANEA         | 5.41E-05 |
| DGKQ          | SIMC1         | 5.41E-05 |
| DGKQ          | MYLK          | 1.10E-05 |
| DGKQ          | OXA1L         | 1.10E-05 |
| DGKQ          | SHPRH         | 1.10E-05 |
| DGKQ          | SSX5          | 5.84E-03 |
| DGKQ          | ZNF366        | 1.10E-05 |
| DGKQ          | PCDH11X       | 5.84E-03 |
| DGKQ          | IL15 (CN gair | 6.83E-03 |
| MANEA         | SIMC1         | 5.41E-05 |
| MANEA         | MYLK          | 1.10E-05 |
| MANEA         | OXA1L         | 1.10E-05 |
| MANEA         | SHPRH         | 1.10E-05 |
| MANEA         | SSX5          | 5.84E-03 |
| MANEA         | ZNF366        | 1.10E-05 |
| MANEA         | PCDH11X       | 5.84E-03 |
| MANEA         | IL15 (CN gair | 6.83E-03 |
| SIMC1         | MYLK          | 1.10E-05 |
| SIMC1         | OXA1L         | 1.10E-05 |
| SIMC1         | SHPRH         | 1.10E-05 |
| SIMC1         | SSX5          | 5.84E-03 |
| SIMC1         | ZNF366        | 1.10E-05 |
| SIMC1         | PCDH11X       | 5.84E-03 |
| SIMC1         | IL15 (CN gair | 6.83E-03 |
| MYLK          | OXA1L         | 2.20E-06 |
| MYLK          | SHPRH         | 2.20E-06 |
| MYLK          | SSX5          | 3.51E-03 |
| MYLK          | ZNF366        | 2.20E-06 |
| MYLK          | PCDH11X       | 3.51E-03 |
| MYLK          | IL15 (CN gair | 1.57E-03 |
| OXA1L         | SHPRH         | 2.20E-06 |
| OXA1L         | SSX5          | 3.51E-03 |
| OXA1L         | ZNF366        | 2.20E-06 |
| OXA1L         | PCDH11X       | 3.51E-03 |
| OXA1L         | IL15 (CN gair | 1.57E-03 |
| SHPRH         | SSX5          | 3.51E-03 |
| SHPRH         | ZNF366        | 2.20E-06 |
| SHPRH         | PCDH11X       | 3.51E-03 |
| SHPRH         | IL15 (CN gair | 1.57E-03 |
| SSX5          | ZNF366        | 3.51E-03 |
| ZNF366        | PCDH11X       | 3.51E-03 |
| ZNF366        | IL15 (CN gair | 1.57E-03 |
| TP53          | CDKN2A (CN    | 3.83E-02 |
| TERT (CN gai  | IL15 (CN gair | 6.41E-05 |
| TERT (CN gai  | FGF1 (CN ga   | 7.51E-15 |
| IL15 (CN gair | FGF1 (CN ga   | 3.20E-05 |
