# Supplementary material
Source: PubMed Central journal article supplement (PMC6857804)
Supplement: NIHMS1057272-supplement-Table_S08b.pdf [file NIHMS1057272-supplement-Table_S08b.pdf]

A vertical rectangular bar filled with a dense, repeating grid pattern of small squares. The pattern is uniform and extends the full height of the bar. The grid lines are thin and black, creating a textured appearance. The bar is positioned on the left side of the page.
