# Supplementary material
Source: PubMed Central journal article supplement (PMC6857804)
Supplement: NIHMS1057272-supplement-Table_S09b.pdf [file NIHMS1057272-supplement-Table_S09b.pdf]

Supplementary Table 9 Gene ontology enrichment analysis in cluster 1 and cluster 2.

Supplementary Table 9b Gene ontology enrichment in cluster 2.

| GO Term                                                                    | originalGeneSetSize | actualGeneSetSize | logitNES | p-value  | q-value  |
|----------------------------------------------------------------------------|---------------------|-------------------|----------|----------|----------|
| IMMUNE RESPONSE                                                            | 1100                | 809               | -0.7559  | 1.73E-34 | 8.13E-31 |
| DEFENSE RESPONSE                                                           | 1231                | 903               | -0.5897  | 3.54E-24 | 3.34E-21 |
| INNATE IMMUNE RESPONSE                                                     | 619                 | 438               | -0.7106  | 7.49E-18 | 1.86E-15 |
| HALLMARK INTERFERON GAMMA RESPONSE                                         | 200                 | 194               | -1.0328  | 1.99E-16 | 3.91E-14 |
| CYTOKINE MEDIATED SIGNALING PATHWAY                                        | 452                 | 372               | -0.6784  | 5.23E-14 | 7.04E-12 |
| RESPONSE TO BIOTIC STIMULUS                                                | 886                 | 652               | -0.5072  | 6.14E-14 | 8.03E-12 |
| ADAPTIVE IMMUNE RESPONSE                                                   | 288                 | 196               | -0.9232  | 9.60E-14 | 1.22E-11 |
| INFLAMMATORY RESPONSE                                                      | 454                 | 352               | -0.6708  | 2.47E-13 | 2.98E-11 |
| RESPONSE TO CYTOKINE                                                       | 714                 | 607               | -0.5120  | 3.84E-13 | 4.11E-11 |
| LEUKOCYTE CELL CELL ADHESION                                               | 255                 | 213               | -0.8483  | 7.83E-13 | 7.84E-11 |
| HALLMARK TNFA SIGNALING VIA NFKB                                           | 200                 | 195               | -0.8840  | 9.97E-13 | 9.21E-11 |
| HALLMARK ALLOGRAFT REJECTION                                               | 200                 | 179               | -0.9138  | 1.76E-12 | 1.56E-10 |
| CELL CELL ADHESION                                                         | 608                 | 516               | -0.5169  | 8.15E-12 | 6.73E-10 |
| SINGLE ORGANISM CELL ADHESION                                              | 459                 | 391               | -0.5876  | 1.24E-11 | 1.00E-09 |
| DEFENSE RESPONSE TO OTHER ORGANISM                                         | 505                 | 327               | -0.6417  | 1.33E-11 | 1.06E-09 |
| CELLULAR RESPONSE TO CYTOKINE STIMULUS                                     | 606                 | 509               | -0.5196  | 1.39E-11 | 1.09E-09 |
| CYTOKINE RECEPTOR ACTIVITY                                                 | 89                  | 70                | -1.4558  | 1.71E-11 | 1.32E-09 |
| LYMPHOCYTE ACTIVATION                                                      | 342                 | 290               | -0.6722  | 2.51E-11 | 1.91E-09 |
| LEUKOCYTE ACTIVATION                                                       | 414                 | 348               | -0.6092  | 3.33E-11 | 2.44E-09 |
| ENDOPLASMIC RETICULUM LUMEN                                                | 201                 | 176               | -0.8633  | 3.37E-11 | 2.44E-09 |
| DEFENSE RESPONSE TO VIRUS                                                  | 164                 | 132               | -0.9956  | 5.00E-11 | 3.23E-09 |
| REGULATION OF IMMUNE RESPONSE                                              | 858                 | 680               | -0.4321  | 6.22E-11 | 3.90E-09 |
| VACUOLAR LUMEN                                                             | 115                 | 100               | -1.1709  | 8.01E-11 | 4.90E-09 |
| REGULATION OF CYTOKINE PRODUCTION                                          | 563                 | 474               | -0.5024  | 1.76E-10 | 1.02E-08 |
| HALLMARK INTERFERON ALPHA RESPONSE                                         | 97                  | 94                | -1.1567  | 1.91E-10 | 1.10E-08 |
| CELL ACTIVATION                                                            | 568                 | 475               | -0.4985  | 2.32E-10 | 1.30E-08 |
| POSITIVE REGULATION OF CYTOKINE PRODUCTION                                 | 370                 | 311               | -0.6080  | 3.75E-10 | 1.98E-08 |
| RESPONSE TO VIRUS                                                          | 247                 | 207               | -0.7431  | 4.75E-10 | 2.46E-08 |
| LYSOSOMAL LUMEN                                                            | 88                  | 82                | -1.2352  | 7.36E-10 | 3.57E-08 |
| CELL SURFACE                                                               | 757                 | 600               | -0.4149  | 6.85E-09 | 3.01E-07 |
| EXTERNAL SIDE OF PLASMA MEMBRANE                                           | 238                 | 173               | -0.7626  | 1.00E-08 | 4.20E-07 |
| HALLMARK INFLAMMATORY RESPONSE                                             | 200                 | 188               | -0.7147  | 1.06E-08 | 4.36E-07 |
| REGULATION OF INFLAMMATORY RESPONSE                                        | 294                 | 237               | -0.6286  | 1.49E-08 | 5.88E-07 |
| REGULATION OF RESPONSE TO WOUNDING                                         | 413                 | 331               | -0.5264  | 2.02E-08 | 7.71E-07 |
| EXTRACELLULAR STRUCTURE ORGANIZATION                                       | 304                 | 265               | -0.5854  | 2.37E-08 | 8.93E-07 |
| RESPONSE TO BACTERIUM                                                      | 528                 | 363               | -0.4939  | 3.54E-08 | 1.30E-06 |
| REGULATION OF CELL ACTIVATION                                              | 484                 | 394               | -0.4720  | 4.09E-08 | 1.48E-06 |
| LYMPHOCYTE DIFFERENTIATION                                                 | 209                 | 172               | -0.7104  | 5.26E-08 | 1.82E-06 |
| IMMUNE EFFECTOR PROCESS                                                    | 486                 | 380               | -0.4692  | 8.37E-08 | 2.78E-06 |
| RESPONSE TO TYPE I INTERFERON                                              | 68                  | 53                | -1.2686  | 2.00E-07 | 6.06E-06 |
| POSITIVE REGULATION OF IMMUNE RESPONSE                                     | 563                 | 454               | -0.4068  | 3.88E-07 | 1.12E-05 |
| CARBOHYDRATE BINDING                                                       | 277                 | 208               | -0.6117  | 4.05E-07 | 1.16E-05 |
| RESPONSE TO MOLECULE OF BACTERIAL ORIGIN                                   | 321                 | 274               | -0.5183  | 4.71E-07 | 1.35E-05 |
| SULFURIC ESTER HYDROLASE ACTIVITY                                          | 17                  | 16                | -2.6134  | 6.41E-07 | 1.72E-05 |
| LEUKOCYTE DIFFERENTIATION                                                  | 292                 | 248               | -0.5352  | 7.41E-07 | 1.94E-05 |
| HALLMARK EPITHELIAL MESENCHYMAL TRANSITION                                 | 200                 | 197               | -0.5884  | 1.24E-06 | 3.10E-05 |
| HALLMARK IL6 JAK STAT3 SIGNALING                                           | 87                  | 81                | -0.9291  | 1.33E-06 | 3.26E-05 |
| POSITIVE REGULATION OF CELL ADHESION                                       | 376                 | 319               | -0.4596  | 1.42E-06 | 3.45E-05 |
| AMINOGLYCAN METABOLIC PROCESS                                              | 166                 | 149               | -0.6705  | 1.63E-06 | 3.88E-05 |
| RESPONSE TO INTERFERON GAMMA                                               | 144                 | 120               | -0.7490  | 1.66E-06 | 3.92E-05 |
| CYTOKINE RECEPTOR BINDING                                                  | 271                 | 192               | -0.5880  | 1.71E-06 | 4.03E-05 |
| REGULATION OF IMMUNE EFFECTOR PROCESS                                      | 424                 | 348               | -0.4338  | 2.02E-06 | 4.73E-05 |
| HALLMARK P53 PATHWAY                                                       | 200                 | 190               | -0.5849  | 2.19E-06 | 4.95E-05 |
| POSITIVE REGULATION OF RESPONSE TO EXTERNAL STIMULUS                       | 296                 | 249               | -0.5099  | 2.25E-06 | 5.07E-05 |
| REGULATION OF INTERLEUKIN 8 PRODUCTION                                     | 61                  | 46                | -1.2335  | 2.29E-06 | 5.13E-05 |
| POSITIVE REGULATION OF CELL ACTIVATION                                     | 311                 | 247               | -0.5094  | 2.52E-06 | 5.62E-05 |
| REGULATION OF HOMOTYPIC CELL CELL ADHESION                                 | 307                 | 260               | -0.4926  | 3.01E-06 | 6.63E-05 |
| CARBOHYDRATE DERIVATIVE CATABOLIC PROCESS                                  | 174                 | 157               | -0.6315  | 3.43E-06 | 7.37E-05 |
| EXTRACELLULAR MATRIX                                                       | 426                 | 352               | -0.4214  | 3.42E-06 | 7.37E-05 |
| REGULATION OF I KAPPAB KINASE NF KAPPAB SIGNALING                          | 233                 | 218               | -0.5313  | 3.97E-06 | 8.34E-05 |
| MUCOPOLYSACCHARIDE METABOLIC PROCESS                                       | 108                 | 99                | -0.7869  | 4.98E-06 | 1.01E-04 |
| REGULATION OF T CELL MEDIATED IMMUNITY                                     | 52                  | 45                | -1.2007  | 5.02E-06 | 1.01E-04 |
| PATTERN RECOGNITION RECEPTOR SIGNALING PATHWAY                             | 109                 | 96                | -0.7977  | 5.23E-06 | 1.03E-04 |
| PROTEINOUS EXTRACELLULAR MATRIX                                            | 356                 | 297               | -0.4441  | 6.76E-06 | 1.28E-04 |
| POSITIVE REGULATION OF INFLAMMATORY RESPONSE                               | 113                 | 92                | -0.8031  | 7.17E-06 | 1.35E-04 |
| LEUKOCYTE MIGRATION                                                        | 259                 | 222               | -0.5112  | 7.42E-06 | 1.38E-04 |
| NEGATIVE REGULATION OF RESPONSE TO WOUNDING                                | 156                 | 121               | -0.6839  | 1.04E-05 | 1.85E-04 |
| AMINOGLYCAN CATABOLIC PROCESS                                              | 68                  | 59                | -0.9950  | 1.07E-05 | 1.91E-04 |
| HYDROLASE ACTIVITY HYDROLYZING O GLYCOSYL COMPOUNDS                        | 96                  | 73                | -0.9221  | 1.15E-05 | 2.01E-04 |
| T CELL SELECTION                                                           | 36                  | 35                | -1.3163  | 1.26E-05 | 2.20E-04 |
| T CELL DIFFERENTIATION                                                     | 123                 | 110               | -0.7071  | 1.41E-05 | 2.43E-04 |
| SIDE OF MEMBRANE                                                           | 428                 | 343               | -0.4063  | 1.43E-05 | 2.45E-04 |
| REGULATION OF ACUTE INFLAMMATORY RESPONSE                                  | 74                  | 62                | -0.9499  | 1.55E-05 | 2.61E-04 |
| HALLMARK IL2 STAT5 SIGNALING                                               | 200                 | 190               | -0.5302  | 1.69E-05 | 2.83E-04 |
| POSITIVE REGULATION OF DEFENSE RESPONSE                                    | 364                 | 312               | -0.4139  | 1.70E-05 | 2.84E-04 |
| CELLULAR RESPONSE TO INTERFERON GAMMA                                      | 122                 | 101               | -0.7284  | 1.84E-05 | 3.01E-04 |
| NEGATIVE REGULATION OF VIRAL PROCESS                                       | 89                  | 80                | -0.8211  | 1.90E-05 | 3.08E-04 |
| REGULATION OF TUMOR NECROSIS FACTOR SUPERFAMILY CYTOKINE PRODUCTION        | 101                 | 87                | -0.7777  | 2.29E-05 | 3.60E-04 |
| LYMPHOCYTE MIGRATION                                                       | 49                  | 35                | -1.2647  | 2.48E-05 | 3.84E-04 |
| REGULATION OF ALPHA BETA T CELL PROLIFERATION                              | 23                  | 20                | -1.7572  | 2.61E-05 | 3.99E-04 |
| ADAPTIVE IMMUNE RESPONSE BASED ON SOMATIC RECOMBINATION OF IMMUNE RECEPTOR | 154                 | 105               | -0.6911  | 3.31E-05 | 4.84E-04 |
| I KAPPAB KINASE NF KAPPAB SIGNALING                                        | 70                  | 68                | -0.8579  | 3.93E-05 | 5.69E-04 |
| REGULATION OF T CELL MEDIATED CYTOTOXICITY                                 | 23                  | 19                | -1.7569  | 4.17E-05 | 5.98E-04 |
| REGULATION OF INTERFERON GAMMA PRODUCTION                                  | 97                  | 76                | -0.8031  | 4.46E-05 | 6.37E-04 |
| REGULATION OF LYMPHOCYTE MEDIATED IMMUNITY                                 | 114                 | 93                | -0.7222  | 4.56E-05 | 6.48E-04 |
| AMINOGLYCAN BIOSYNTHETIC PROCESS                                           | 107                 | 103               | -0.6836  | 4.74E-05 | 6.68E-04 |
| ER TO GOLGI TRANSPORT VESICLE                                              | 71                  | 67                | -0.8544  | 4.78E-05 | 6.72E-04 |
| REGULATION OF LYMPHOCYTE DIFFERENTIATION                                   | 132                 | 111               | -0.6560  | 4.96E-05 | 6.91E-04 |
| NEGATIVE REGULATION OF MULTI ORGANISM PROCESS                              | 151                 | 124               | -0.6183  | 5.18E-05 | 7.16E-04 |
| LYMPHOCYTE CHEMOTAXIS                                                      | 38                  | 25                | -1.4613  | 5.34E-05 | 7.32E-04 |
| ALPHA BETA T CELL ACTIVATION                                               | 54                  | 46                | -1.0371  | 5.35E-05 | 7.32E-04 |
| REGULATION OF ADAPTIVE IMMUNE RESPONSE                                     | 123                 | 107               | -0.6642  | 5.52E-05 | 7.45E-04 |
| ER TO GOLGI TRANSPORT VESICLE MEMBRANE                                     | 55                  | 51                | -0.9787  | 5.55E-05 | 7.47E-04 |
| REGULATION OF LEUKOCYTE PROLIFERATION                                      | 206                 | 174               | -0.5153  | 6.18E-05 | 8.20E-04 |
| REGULATION OF LEUKOCYTE DIFFERENTIATION                                    | 232                 | 193               | -0.4844  | 7.27E-05 | 9.46E-04 |
| REGULATION OF CYTOKINE BIOSYNTHETIC PROCESS                                | 94                  | 80                | -0.7580  | 7.40E-05 | 9.60E-04 |
| POSITIVE REGULATION OF INTERLEUKIN 8 PRODUCTION                            | 45                  | 34                | -1.1958  | 7.69E-05 | 9.82E-04 |
