# Supplementary material
Source: PubMed Central journal article supplement (PMC6857804)
Supplement: NIHMS1057272-supplement-Table_S10.pdf [file NIHMS1057272-supplement-Table_S10.pdf]

**Supplementary Table 10 Ranked list by MWW test comparing high-immune versus low-immune low-grade glioma sub-groups.**

| <b>Gene Symbol</b> | <b>MWW-score</b> |
|--------------------|------------------|
| PDCD1              | 0.9556           |
| MYO1G              | 0.9056           |
| IFI30              | 0.9000           |
| IL18RAP            | 0.8667           |
| HLA-F              | 0.8556           |
| TICAM1             | 0.8556           |
| CCL18              | 0.8167           |
| IRF4               | 0.8167           |
| CXCR4              | 0.7778           |
| IL18R1             | 0.7000           |
| IL1RN              | 0.6833           |
| CD1C               | 0.6722           |
| CCL4               | 0.6556           |
| EGR3               | 0.6444           |
| IL6                | 0.6444           |
| IL1RL2             | 0.5556           |
| CD1E               | 0.5111           |

*Quantitative RT-PCR tested genes are selected and highlighted in yellow.*
