# Supplementary material
Source: PubMed Central journal article supplement (PMC6857804)
Supplement: NIHMS1057272-supplement-Table_S11a.pdf [file NIHMS1057272-supplement-Table_S11a.pdf]

| Year | Q1 | Q2 | Q3 | Q4 | Annual Total |
|------|----|----|----|----|--------------|
| 2010 | 10 | 10 | 10 | 10 | 40           |
| 2011 | 10 | 10 | 10 | 10 | 40           |
| 2012 | 10 | 10 | 10 | 10 | 40           |
| 2013 | 10 | 10 | 10 | 10 | 40           |
| 2014 | 10 | 10 | 10 | 10 | 40           |
| 2015 | 10 | 10 | 10 | 10 | 40           |
| 2016 | 10 | 10 | 10 | 10 | 40           |
| 2017 | 10 | 10 | 10 | 10 | 40           |
| 2018 | 10 | 10 | 10 | 10 | 40           |
| 2019 | 10 | 10 | 10 | 10 | 40           |
| 2020 | 10 | 10 | 10 | 10 | 40           |
| 2021 | 10 | 10 | 10 | 10 | 40           |
| 2022 | 10 | 10 | 10 | 10 | 40           |
| 2023 | 10 | 10 | 10 | 10 | 40           |
| 2024 | 10 | 10 | 10 | 10 | 40           |
| 2025 | 10 | 10 | 10 | 10 | 40           |
| 2026 | 10 | 10 | 10 | 10 | 40           |
| 2027 | 10 | 10 | 10 | 10 | 40           |
| 2028 | 10 | 10 | 10 | 10 | 40           |
| 2029 | 10 | 10 | 10 | 10 | 40           |
| 2030 | 10 | 10 | 10 | 10 | 40           |
| 2031 | 10 | 10 | 10 | 10 | 40           |
| 2032 | 10 | 10 | 10 | 10 | 40           |
| 2033 | 10 | 10 | 10 | 10 | 40           |
| 2034 | 10 | 10 | 10 | 10 | 40           |
| 2035 | 10 | 10 | 10 | 10 | 40           |
| 2036 | 10 | 10 | 10 | 10 | 40           |
| 2037 | 10 | 10 | 10 | 10 | 40           |
| 2038 | 10 | 10 | 10 | 10 | 40           |
| 2039 | 10 | 10 | 10 | 10 | 40           |
| 2040 | 10 | 10 | 10 | 10 | 40           |
| 2041 | 10 | 10 | 10 | 10 | 40           |
| 2042 | 10 | 10 | 10 | 10 | 40           |
| 2043 | 10 | 10 | 10 | 10 | 40           |
| 2044 | 10 | 10 | 10 | 10 | 40           |
| 2045 | 10 | 10 | 10 | 10 | 40           |
| 2046 | 10 | 10 | 10 | 10 | 40           |
| 2047 | 10 | 10 | 10 | 10 | 40           |
| 2048 | 10 | 10 | 10 | 10 | 40           |
| 2049 | 10 | 10 | 10 | 10 | 40           |
| 2050 | 10 | 10 | 10 | 10 | 40           |
| 2051 | 10 | 10 | 10 | 10 | 40           |
| 2052 | 10 | 10 | 10 | 10 | 40           |
| 2053 | 10 | 10 | 10 | 10 | 40           |
| 2054 | 10 | 10 | 10 | 10 | 40           |
| 2055 | 10 | 10 | 10 | 10 | 40           |
| 2056 | 10 | 10 | 10 | 10 | 40           |
| 2057 | 10 | 10 | 10 | 10 | 40           |
| 2058 | 10 | 10 | 10 | 10 | 40           |
| 2059 | 10 | 10 | 10 | 10 | 40           |
| 2060 | 10 | 10 | 10 | 10 | 40           |
| 2061 | 10 | 10 | 10 | 10 | 40           |
| 2062 | 10 | 10 | 10 | 10 | 40           |
| 2063 | 10 | 10 | 10 | 10 | 40           |
| 2064 | 10 | 10 | 10 | 10 | 40           |
| 2065 | 10 | 10 | 10 | 10 | 40           |
| 2066 | 10 | 10 | 10 | 10 | 40           |
| 2067 | 10 | 10 | 10 | 10 | 40           |
| 2068 | 10 | 10 | 10 | 10 | 40           |
| 2069 | 10 | 10 | 10 | 10 | 40           |
| 2070 | 10 | 10 | 10 | 10 | 40           |
| 2071 | 10 | 10 | 10 | 10 | 40           |
| 2072 | 10 | 10 | 10 | 10 | 40           |
| 2073 | 10 | 10 | 10 | 10 | 40           |
| 2074 | 10 | 10 | 10 | 10 | 40           |
| 2075 | 10 | 10 | 10 | 10 | 40           |
| 2076 | 10 | 10 | 10 | 10 | 40           |
| 2077 | 10 | 10 | 10 | 10 | 40           |
| 2078 | 10 | 10 | 10 | 10 | 40           |
| 2079 | 10 | 10 | 10 | 10 | 40           |
| 2080 | 10 | 10 | 10 | 10 | 40           |
| 2081 | 10 | 10 | 10 | 10 | 40           |
| 2082 | 10 | 10 | 10 | 10 | 40           |
| 2083 | 10 | 10 | 10 | 10 | 40           |
| 2084 | 10 | 10 | 10 | 10 | 40           |
| 2085 | 10 | 10 | 10 | 10 | 40           |
| 2086 | 10 | 10 | 10 | 10 | 40           |
| 2087 | 10 | 10 | 10 | 10 | 40           |
| 2088 | 10 | 10 | 10 | 10 | 40           |
| 2089 | 10 | 10 | 10 | 10 | 40           |
| 2090 | 10 | 10 | 10 | 10 | 40           |
| 2091 | 10 | 10 | 10 | 10 | 40           |
| 2092 | 10 | 10 | 10 | 10 | 40           |
| 2093 | 10 | 10 | 10 | 10 | 40           |
| 2094 | 10 | 10 | 10 | 10 | 40           |
| 2095 | 10 | 10 | 10 | 10 | 40           |
| 2096 | 10 | 10 | 10 | 10 | 40           |
| 2097 | 10 | 10 | 10 | 10 | 40           |
| 2098 | 10 | 10 | 10 | 10 | 40           |
| 2099 | 10 | 10 | 10 | 10 | 40           |
| 2100 | 10 | 10 | 10 | 10 | 40           |



| Year       | 2010 | 2011 | 2012 | 2013 | 2014 | 2015 | 2016 | 2017 | 2018 | 2019 | 2020 | 2021 | 2022 | 2023 | 2024 | 2025 | 2026 | 2027 | 2028 | 2029 | 2030 | 2031 | 2032 | 2033 | 2034 | 2035 | 2036 | 2037 | 2038 | 2039 | 2040 | 2041 | 2042 | 2043 | 2044 | 2045 | 2046 | 2047 | 2048 | 2049 | 2050 | 2051 | 2052 | 2053 | 2054 | 2055 | 2056 | 2057 | 2058 | 2059 | 2060 | 2061 | 2062 | 2063 | 2064 | 2065 | 2066 | 2067 | 2068 | 2069 | 2070 | 2071 | 2072 | 2073 | 2074 | 2075 | 2076 | 2077 | 2078 | 2079 | 2080 | 2081 | 2082 | 2083 | 2084 | 2085 | 2086 | 2087 | 2088 | 2089 | 2090 | 2091 | 2092 | 2093 | 2094 | 2095 | 2096 | 2097 | 2098 | 2099 |      |      |      |      |      |      |      |      |      |      |      |      |      |      |      |      |      |      |      |      |      |      |      |      |      |      |      |      |      |      |      |      |      |      |      |      |      |      |      |      |      |      |      |      |      |      |      |      |      |      |      |      |      |      |      |      |      |      |      |      |      |      |      |      |      |      |      |      |      |      |      |      |      |      |      |      |      |      |      |      |      |      |      |      |      |      |      |      |      |      |      |      |      |      |      |      |      |      |      |      |      |      |      |      |      |      |      |      |      |      |      |      |      |      |      |      |      |      |      |      |      |      |      |      |      |      |      |      |      |      |      |      |      |      |      |      |      |      |      |      |      |      |      |      |      |      |      |      |      |      |      |      |      |      |      |      |      |      |      |      |      |      |      |      |      |      |      |      |      |      |      |      |      |      |      |      |      |      |      |      |      |      |      |      |      |      |      |      |      |      |      |      |      |      |      |      |      |      |      |      |      |      |      |      |      |      |      |      |      |      |      |      |      |      |      |      |      |      |      |      |      |      |      |      |      |      |      |      |      |      |      |      |      |      |      |      |      |      |      |      |      |      |      |      |      |      |      |      |      |      |      |      |      |      |      |      |      |      |      |      |      |      |      |      |      |      |      |      |      |      |      |      |      |      |      |      |      |      |      |      |      |      |      |      |      |      |      |      |      |      |      |      |      |      |      |      |      |      |      |      |      |      |      |      |      |      |      |      |      |      |      |      |      |      |      |      |      |      |      |      |      |      |      |      |      |      |      |      |      |      |      |      |      |      |      |      |      |      |      |      |      |      |      |      |      |      |      |      |      |      |      |      |      |      |      |      |      |      |      |      |      |      |      |      |      |      |      |      |      |      |      |      |      |      |      |      |      |      |      |      |      |      |      |      |      |      |      |      |      |      |      |      |      |      |      |      |      |      |      |      |      |      |      |      |      |      |      |      |      |      |      |      |      |      |      |      |      |      |      |      |      |      |      |      |      |      |      |      |      |      |      |      |      |      |      |      |      |      |      |      |      |      |      |      |      |      |      |      |      |      |      |      |      |      |      |      |      |      |      |      |      |      |      |      |      |      |      |      |      |      |      |      |      |      |      |      |      |      |      |      |      |      |      |      |      |      |      |      |      |      |      |      |      |      |      |      |      |      |      |      |      |      |      |      |      |      |      |      |      |      |      |      |      |      |      |      |      |      |      |      |      |      |      |      |      |      |      |      |      |      |      |      |      |      |      |      |      |      |      |      |      |      |      |      |      |      |      |      |      |      |      |      |      |      |      |      |      |      |      |      |      |      |      |      |      |      |      |      |      |      |      |      |      |      |      |      |      |      |      |      |      |      |      |      |      |      |      |      |      |      |      |      |      |      |      |      |      |      |      |      |      |      |      |      |      |      |      |      |      |      |      |      |      |      |      |      |      |      |      |      |      |      |      |      |      |      |      |      |      |      |      |      |      |      |      |      |      |      |      |      |      |      |      |      |      |      |      |      |      |      |      |      |      |      |      |      |      |      |      |      |      |      |      |      |      |      |      |      |      |      |      |      |      |      |      |      |      |      |      |      |      |      |      |      |      |      |      |      |      |      |      |      |      |      |      |      |      |      |      |      |      |      |      |      |      |      |      |      |      |      |      |      |      |      |      |      |      |      |      |      |      |      |      |      |      |      |      |      |      |      |      |      |      |      |      |      |      |      |      |      |      |      |      |      |      |      |      |      |      |      |      |      |      |      |      |      |      |      |      |      |      |      |      |      |      |      |      |      |      |      |      |      |      |      |      |      |      |      |      |      |      |      |      |      |      |      |      |      |      |      |      |      |      |      |      |      |      |      |      |      |      |      |      |      |      |      |      |      |      |      |      |      |      |      |      |      |      |      |      |      |      |      |      |      |      |      |      |      |      |      |      |      |      |      |       |
|------------|------|------|------|------|------|------|------|------|------|------|------|------|------|------|------|------|------|------|------|------|------|------|------|------|------|------|------|------|------|------|------|------|------|------|------|------|------|------|------|------|------|------|------|------|------|------|------|------|------|------|------|------|------|------|------|------|------|------|------|------|------|------|------|------|------|------|------|------|------|------|------|------|------|------|------|------|------|------|------|------|------|------|------|------|------|------|------|------|------|------|------|------|------|------|------|------|------|------|------|------|------|------|------|------|------|------|------|------|------|------|------|------|------|------|------|------|------|------|------|------|------|------|------|------|------|------|------|------|------|------|------|------|------|------|------|------|------|------|------|------|------|------|------|------|------|------|------|------|------|------|------|------|------|------|------|------|------|------|------|------|------|------|------|------|------|------|------|------|------|------|------|------|------|------|------|------|------|------|------|------|------|------|------|------|------|------|------|------|------|------|------|------|------|------|------|------|------|------|------|------|------|------|------|------|------|------|------|------|------|------|------|------|------|------|------|------|------|------|------|------|------|------|------|------|------|------|------|------|------|------|------|------|------|------|------|------|------|------|------|------|------|------|------|------|------|------|------|------|------|------|------|------|------|------|------|------|------|------|------|------|------|------|------|------|------|------|------|------|------|------|------|------|------|------|------|------|------|------|------|------|------|------|------|------|------|------|------|------|------|------|------|------|------|------|------|------|------|------|------|------|------|------|------|------|------|------|------|------|------|------|------|------|------|------|------|------|------|------|------|------|------|------|------|------|------|------|------|------|------|------|------|------|------|------|------|------|------|------|------|------|------|------|------|------|------|------|------|------|------|------|------|------|------|------|------|------|------|------|------|------|------|------|------|------|------|------|------|------|------|------|------|------|------|------|------|------|------|------|------|------|------|------|------|------|------|------|------|------|------|------|------|------|------|------|------|------|------|------|------|------|------|------|------|------|------|------|------|------|------|------|------|------|------|------|------|------|------|------|------|------|------|------|------|------|------|------|------|------|------|------|------|------|------|------|------|------|------|------|------|------|------|------|------|------|------|------|------|------|------|------|------|------|------|------|------|------|------|------|------|------|------|------|------|------|------|------|------|------|------|------|------|------|------|------|------|------|------|------|------|------|------|------|------|------|------|------|------|------|------|------|------|------|------|------|------|------|------|------|------|------|------|------|------|------|------|------|------|------|------|------|------|------|------|------|------|------|------|------|------|------|------|------|------|------|------|------|------|------|------|------|------|------|------|------|------|------|------|------|------|------|------|------|------|------|------|------|------|------|------|------|------|------|------|------|------|------|------|------|------|------|------|------|------|------|------|------|------|------|------|------|------|------|------|------|------|------|------|------|------|------|------|------|------|------|------|------|------|------|------|------|------|------|------|------|------|------|------|------|------|------|------|------|------|------|------|------|------|------|------|------|------|------|------|------|------|------|------|------|------|------|------|------|------|------|------|------|------|------|------|------|------|------|------|------|------|------|------|------|------|------|------|------|------|------|------|------|------|------|------|------|------|------|------|------|------|------|------|------|------|------|------|------|------|------|------|------|------|------|------|------|------|------|------|------|------|------|------|------|------|------|------|------|------|------|------|------|------|------|------|------|------|------|------|------|------|------|------|------|------|------|------|------|------|------|------|------|------|------|------|------|------|------|------|------|------|------|------|------|------|------|------|------|------|------|------|------|------|------|------|------|------|------|------|------|------|------|------|------|------|------|------|------|------|------|------|------|------|------|------|------|------|------|------|------|------|------|------|------|------|------|------|------|------|------|------|------|------|------|------|------|------|------|------|------|------|------|------|------|------|------|------|------|------|------|------|------|------|------|------|------|------|------|------|------|------|------|------|------|------|------|------|------|------|------|------|------|------|------|------|------|------|------|------|------|------|------|------|------|------|------|------|------|------|------|------|------|------|------|------|------|------|------|------|------|------|------|------|------|------|------|------|------|------|------|------|------|------|------|------|------|------|------|------|------|------|------|------|------|------|------|------|------|------|------|------|------|------|------|------|------|------|------|------|------|------|------|------|------|------|------|------|------|------|------|------|------|------|------|------|------|------|------|------|------|------|------|------|------|------|------|------|------|------|------|------|------|------|------|------|------|------|------|------|------|------|------|------|------|------|------|------|------|------|------|-------|
| Population | 7.6  | 7.7  | 7.8  | 7.9  | 8.0  | 8.1  | 8.2  | 8.3  | 8.4  | 8.5  | 8.6  | 8.7  | 8.8  | 8.9  | 9.0  | 9.1  | 9.2  | 9.3  | 9.4  | 9.5  | 9.6  | 9.7  | 9.8  | 9.9  | 10.0 | 10.1 | 10.2 | 10.3 | 10.4 | 10.5 | 10.6 | 10.7 | 10.8 | 10.9 | 11.0 | 11.1 | 11.2 | 11.3 | 11.4 | 11.5 | 11.6 | 11.7 | 11.8 | 11.9 | 12.0 | 12.1 | 12.2 | 12.3 | 12.4 | 12.5 | 12.6 | 12.7 | 12.8 | 12.9 | 13.0 | 13.1 | 13.2 | 13.3 | 13.4 | 13.5 | 13.6 | 13.7 | 13.8 | 13.9 | 14.0 | 14.1 | 14.2 | 14.3 | 14.4 | 14.5 | 14.6 | 14.7 | 14.8 | 14.9 | 15.0 | 15.1 | 15.2 | 15.3 | 15.4 | 15.5 | 15.6 | 15.7 | 15.8 | 15.9 | 16.0 | 16.1 | 16.2 | 16.3 | 16.4 | 16.5 | 16.6 | 16.7 | 16.8 | 16.9 | 17.0 | 17.1 | 17.2 | 17.3 | 17.4 | 17.5 | 17.6 | 17.7 | 17.8 | 17.9 | 18.0 | 18.1 | 18.2 | 18.3 | 18.4 | 18.5 | 18.6 | 18.7 | 18.8 | 18.9 | 19.0 | 19.1 | 19.2 | 19.3 | 19.4 | 19.5 | 19.6 | 19.7 | 19.8 | 19.9 | 20.0 | 20.1 | 20.2 | 20.3 | 20.4 | 20.5 | 20.6 | 20.7 | 20.8 | 20.9 | 21.0 | 21.1 | 21.2 | 21.3 | 21.4 | 21.5 | 21.6 | 21.7 | 21.8 | 21.9 | 22.0 | 22.1 | 22.2 | 22.3 | 22.4 | 22.5 | 22.6 | 22.7 | 22.8 | 22.9 | 23.0 | 23.1 | 23.2 | 23.3 | 23.4 | 23.5 | 23.6 | 23.7 | 23.8 | 23.9 | 24.0 | 24.1 | 24.2 | 24.3 | 24.4 | 24.5 | 24.6 | 24.7 | 24.8 | 24.9 | 25.0 | 25.1 | 25.2 | 25.3 | 25.4 | 25.5 | 25.6 | 25.7 | 25.8 | 25.9 | 26.0 | 26.1 | 26.2 | 26.3 | 26.4 | 26.5 | 26.6 | 26.7 | 26.8 | 26.9 | 27.0 | 27.1 | 27.2 | 27.3 | 27.4 | 27.5 | 27.6 | 27.7 | 27.8 | 27.9 | 28.0 | 28.1 | 28.2 | 28.3 | 28.4 | 28.5 | 28.6 | 28.7 | 28.8 | 28.9 | 29.0 | 29.1 | 29.2 | 29.3 | 29.4 | 29.5 | 29.6 | 29.7 | 29.8 | 29.9 | 30.0 | 30.1 | 30.2 | 30.3 | 30.4 | 30.5 | 30.6 | 30.7 | 30.8 | 30.9 | 31.0 | 31.1 | 31.2 | 31.3 | 31.4 | 31.5 | 31.6 | 31.7 | 31.8 | 31.9 | 32.0 | 32.1 | 32.2 | 32.3 | 32.4 | 32.5 | 32.6 | 32.7 | 32.8 | 32.9 | 33.0 | 33.1 | 33.2 | 33.3 | 33.4 | 33.5 | 33.6 | 33.7 | 33.8 | 33.9 | 34.0 | 34.1 | 34.2 | 34.3 | 34.4 | 34.5 | 34.6 | 34.7 | 34.8 | 34.9 | 35.0 | 35.1 | 35.2 | 35.3 | 35.4 | 35.5 | 35.6 | 35.7 | 35.8 | 35.9 | 36.0 | 36.1 | 36.2 | 36.3 | 36.4 | 36.5 | 36.6 | 36.7 | 36.8 | 36.9 | 37.0 | 37.1 | 37.2 | 37.3 | 37.4 | 37.5 | 37.6 | 37.7 | 37.8 | 37.9 | 38.0 | 38.1 | 38.2 | 38.3 | 38.4 | 38.5 | 38.6 | 38.7 | 38.8 | 38.9 | 39.0 | 39.1 | 39.2 | 39.3 | 39.4 | 39.5 | 39.6 | 39.7 | 39.8 | 39.9 | 40.0 | 40.1 | 40.2 | 40.3 | 40.4 | 40.5 | 40.6 | 40.7 | 40.8 | 40.9 | 41.0 | 41.1 | 41.2 | 41.3 | 41.4 | 41.5 | 41.6 | 41.7 | 41.8 | 41.9 | 42.0 | 42.1 | 42.2 | 42.3 | 42.4 | 42.5 | 42.6 | 42.7 | 42.8 | 42.9 | 43.0 | 43.1 | 43.2 | 43.3 | 43.4 | 43.5 | 43.6 | 43.7 | 43.8 | 43.9 | 44.0 | 44.1 | 44.2 | 44.3 | 44.4 | 44.5 | 44.6 | 44.7 | 44.8 | 44.9 | 45.0 | 45.1 | 45.2 | 45.3 | 45.4 | 45.5 | 45.6 | 45.7 | 45.8 | 45.9 | 46.0 | 46.1 | 46.2 | 46.3 | 46.4 | 46.5 | 46.6 | 46.7 | 46.8 | 46.9 | 47.0 | 47.1 | 47.2 | 47.3 | 47.4 | 47.5 | 47.6 | 47.7 | 47.8 | 47.9 | 48.0 | 48.1 | 48.2 | 48.3 | 48.4 | 48.5 | 48.6 | 48.7 | 48.8 | 48.9 | 49.0 | 49.1 | 49.2 | 49.3 | 49.4 | 49.5 | 49.6 | 49.7 | 49.8 | 49.9 | 50.0 | 50.1 | 50.2 | 50.3 | 50.4 | 50.5 | 50.6 | 50.7 | 50.8 | 50.9 | 51.0 | 51.1 | 51.2 | 51.3 | 51.4 | 51.5 | 51.6 | 51.7 | 51.8 | 51.9 | 52.0 | 52.1 | 52.2 | 52.3 | 52.4 | 52.5 | 52.6 | 52.7 | 52.8 | 52.9 | 53.0 | 53.1 | 53.2 | 53.3 | 53.4 | 53.5 | 53.6 | 53.7 | 53.8 | 53.9 | 54.0 | 54.1 | 54.2 | 54.3 | 54.4 | 54.5 | 54.6 | 54.7 | 54.8 | 54.9 | 55.0 | 55.1 | 55.2 | 55.3 | 55.4 | 55.5 | 55.6 | 55.7 | 55.8 | 55.9 | 56.0 | 56.1 | 56.2 | 56.3 | 56.4 | 56.5 | 56.6 | 56.7 | 56.8 | 56.9 | 57.0 | 57.1 | 57.2 | 57.3 | 57.4 | 57.5 | 57.6 | 57.7 | 57.8 | 57.9 | 58.0 | 58.1 | 58.2 | 58.3 | 58.4 | 58.5 | 58.6 | 58.7 | 58.8 | 58.9 | 59.0 | 59.1 | 59.2 | 59.3 | 59.4 | 59.5 | 59.6 | 59.7 | 59.8 | 59.9 | 60.0 | 60.1 | 60.2 | 60.3 | 60.4 | 60.5 | 60.6 | 60.7 | 60.8 | 60.9 | 61.0 | 61.1 | 61.2 | 61.3 | 61.4 | 61.5 | 61.6 | 61.7 | 61.8 | 61.9 | 62.0 | 62.1 | 62.2 | 62.3 | 62.4 | 62.5 | 62.6 | 62.7 | 62.8 | 62.9 | 63.0 | 63.1 | 63.2 | 63.3 | 63.4 | 63.5 | 63.6 | 63.7 | 63.8 | 63.9 | 64.0 | 64.1 | 64.2 | 64.3 | 64.4 | 64.5 | 64.6 | 64.7 | 64.8 | 64.9 | 65.0 | 65.1 | 65.2 | 65.3 | 65.4 | 65.5 | 65.6 | 65.7 | 65.8 | 65.9 | 66.0 | 66.1 | 66.2 | 66.3 | 66.4 | 66.5 | 66.6 | 66.7 | 66.8 | 66.9 | 67.0 | 67.1 | 67.2 | 67.3 | 67.4 | 67.5 | 67.6 | 67.7 | 67.8 | 67.9 | 68.0 | 68.1 | 68.2 | 68.3 | 68.4 | 68.5 | 68.6 | 68.7 | 68.8 | 68.9 | 69.0 | 69.1 | 69.2 | 69.3 | 69.4 | 69.5 | 69.6 | 69.7 | 69.8 | 69.9 | 70.0 | 70.1 | 70.2 | 70.3 | 70.4 | 70.5 | 70.6 | 70.7 | 70.8 | 70.9 | 71.0 | 71.1 | 71.2 | 71.3 | 71.4 | 71.5 | 71.6 | 71.7 | 71.8 | 71.9 | 72.0 | 72.1 | 72.2 | 72.3 | 72.4 | 72.5 | 72.6 | 72.7 | 72.8 | 72.9 | 73.0 | 73.1 | 73.2 | 73.3 | 73.4 | 73.5 | 73.6 | 73.7 | 73.8 | 73.9 | 74.0 | 74.1 | 74.2 | 74.3 | 74.4 | 74.5 | 74.6 | 74.7 | 74.8 | 74.9 | 75.0 | 75.1 | 75.2 | 75.3 | 75.4 | 75.5 | 75.6 | 75.7 | 75.8 | 75.9 | 76.0 | 76.1 | 76.2 | 76.3 | 76.4 | 76.5 | 76.6 | 76.7 | 76.8 | 76.9 | 77.0 | 77.1 | 77.2 | 77.3 | 77.4 | 77.5 | 77.6 | 77.7 | 77.8 | 77.9 | 78.0 | 78.1 | 78.2 | 78.3 | 78.4 | 78.5 | 78.6 | 78.7 | 78.8 | 78.9 | 79.0 | 79.1 | 79.2 | 79.3 | 79.4 | 79.5 | 79.6 | 79.7 | 79.8 | 79.9 | 80.0 | 80.1 | 80.2 | 80.3 | 80.4 | 80.5 | 80.6 | 80.7 | 80.8 | 80.9 | 81.0 | 81.1 | 81.2 | 81.3 | 81.4 | 81.5 | 81.6 | 81.7 | 81.8 | 81.9 | 82.0 | 82.1 | 82.2 | 82.3 | 82.4 | 82.5 | 82.6 | 82.7 | 82.8 | 82.9 | 83.0 | 83.1 | 83.2 | 83.3 | 83.4 | 83.5 | 83.6 | 83.7 | 83.8 | 83.9 | 84.0 | 84.1 | 84.2 | 84.3 | 84.4 | 84.5 | 84.6 | 84.7 | 84.8 | 84.9 | 85.0 | 85.1 | 85.2 | 85.3 | 85.4 | 85.5 | 85.6 | 85.7 | 85.8 | 85.9 | 86.0 | 86.1 | 86.2 | 86.3 | 86.4 | 86.5 | 86.6 | 86.7 | 86.8 | 86.9 | 87.0 | 87.1 | 87.2 | 87.3 | 87.4 | 87.5 | 87.6 | 87.7 | 87.8 | 87.9 | 88.0 | 88.1 | 88.2 | 88.3 | 88.4 | 88.5 | 88.6 | 88.7 | 88.8 | 88.9 | 89.0 | 89.1 | 89.2 | 89.3 | 89.4 | 89.5 | 89.6 | 89.7 | 89.8 | 89.9 | 90.0 | 90.1 | 90.2 | 90.3 | 90.4 | 90.5 | 90.6 | 90.7 | 90.8 | 90.9 | 91.0 | 91.1 | 91.2 | 91.3 | 91.4 | 91.5 | 91.6 | 91.7 | 91.8 | 91.9 | 92.0 | 92.1 | 92.2 | 92.3 | 92.4 | 92.5 | 92.6 | 92.7 | 92.8 | 92.9 | 93.0 | 93.1 | 93.2 | 93.3 | 93.4 | 93.5 | 93.6 | 93.7 | 93.8 | 93.9 | 94.0 | 94.1 | 94.2 | 94.3 | 94.4 | 94.5 | 94.6 | 94.7 | 94.8 | 94.9 | 95.0 | 95.1 | 95.2 | 95.3 | 95.4 | 95.5 | 95.6 | 95.7 | 95.8 | 95.9 | 96.0 | 96.1 | 96.2 | 96.3 | 96.4 | 96.5 | 96.6 | 96.7 | 96.8 | 96.9 | 97.0 | 97.1 | 97.2 | 97.3 | 97.4 | 97.5 | 97.6 | 97.7 | 97.8 | 97.9 | 98.0 | 98.1 | 98.2 | 98.3 | 98.4 | 98.5 | 98.6 | 98.7 | 98.8 | 98.9 | 99.0 | 99.1 | 99.2 | 99.3 | 99.4 | 99.5 | 99.6 | 99.7 | 99.8 | 99.9 | 100.0 |



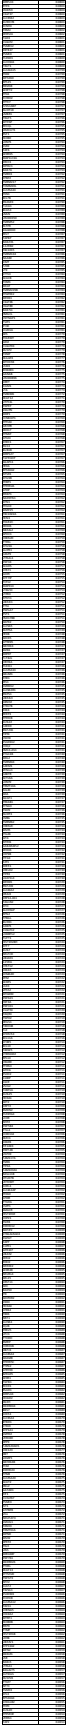

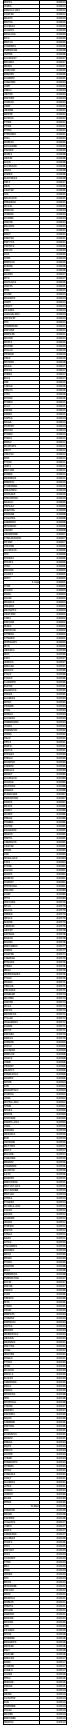

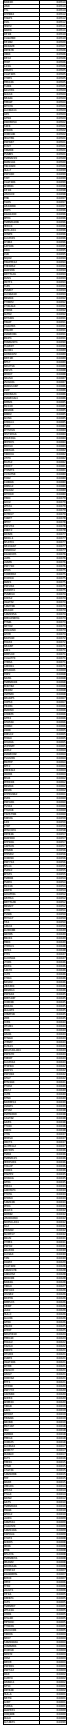

A vertical bar with a dense grid pattern, possibly a barcode or a decorative element. The grid consists of many small, closely spaced horizontal and vertical lines, creating a textured appearance. The bar is positioned on the left side of the page and extends vertically across most of the page's height.



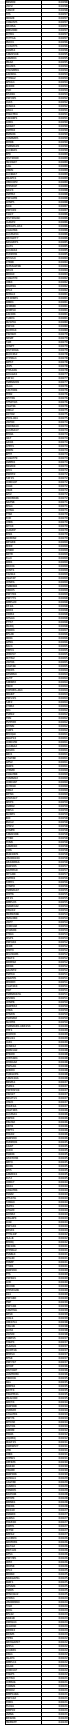

A vertical bar consisting of a dense grid of horizontal and vertical lines, resembling a scanning artifact or a data visualization element. The grid is composed of many thin, closely spaced lines that create a textured appearance. The bar is positioned on the left side of the page and extends from near the top to near the bottom.

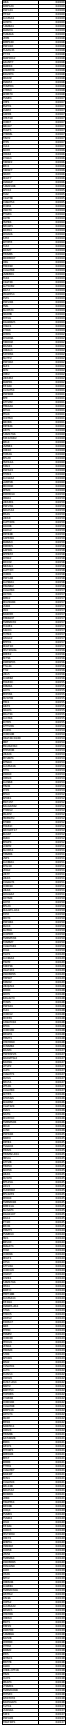



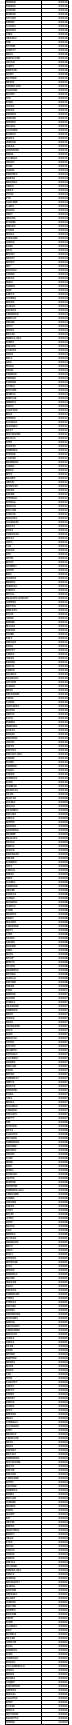



The image shows a vertical rectangular bar on the left side of a white page. The bar is filled with a dense, repeating pattern of small, horizontal lines, creating a textured, grid-like appearance. This pattern is consistent throughout the height of the bar. The rest of the page is blank white space.

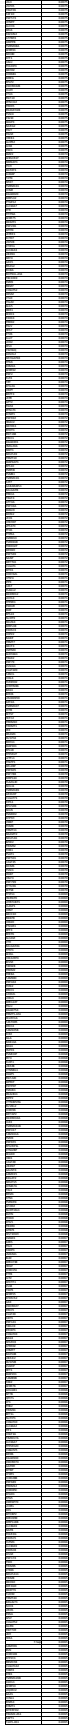







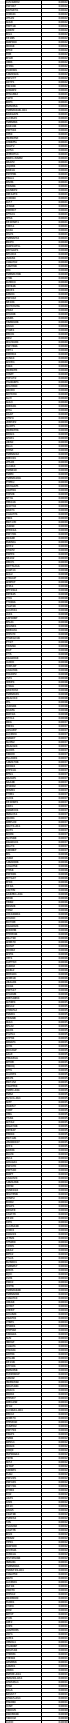

A vertical rectangular bar filled with a dense grid of horizontal and vertical lines, creating a textured, woven appearance. The grid consists of many thin, closely spaced lines that form a series of small, uniform squares throughout the entire length of the bar.

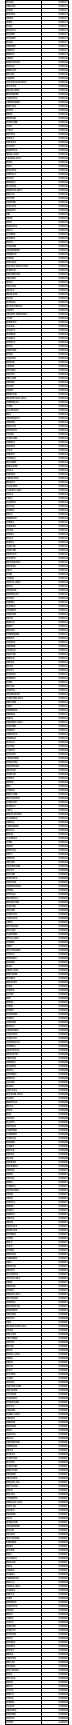



A vertical grid of empty cells, likely a placeholder for a table or form. The grid consists of approximately 10 columns and 100 rows, forming a narrow vertical strip on the left side of the page.
