# Supplementary material
Source: PubMed Central journal article supplement (PMC6857804)
Supplement: NIHMS1057272-supplement-Table_S12.pdf [file NIHMS1057272-supplement-Table_S12.pdf]

Supplementary Table 12 Gene ontology enrichment analysis of the hyper-methylated genes comparing low-immune and high-immune low-grade glioma sub-groups.

| GO Term                                                                                                      | originalGeneSetSize | actualGeneSetSize | logitNES | p-value  |
|--------------------------------------------------------------------------------------------------------------|---------------------|-------------------|----------|----------|
| IMMUNE RESPONSE                                                                                              | 1100                | 425               | 0.8575   | 6.78E-24 |
| CELL ACTIVATION                                                                                              | 568                 | 287               | 0.8188   | 1.37E-15 |
| REGULATION OF IMMUNE RESPONSE                                                                                | 858                 | 427               | 0.6317   | 4.67E-14 |
| POSITIVE REGULATION OF IMMUNE SYSTEM PROCESS                                                                 | 867                 | 428               | 0.6125   | 2.37E-13 |
| LEUKOCYTE ACTIVATION                                                                                         | 414                 | 213               | 0.8673   | 2.98E-13 |
| LEUKOCYTE CELL CELL ADHESION                                                                                 | 255                 | 132               | 1.1041   | 5.46E-13 |
| LYMPHOCYTE ACTIVATION                                                                                        | 342                 | 185               | 0.9163   | 7.53E-13 |
| REGULATION OF CYTOKINE PRODUCTION                                                                            | 563                 | 287               | 0.7260   | 1.06E-12 |
| POSITIVE REGULATION OF IMMUNE RESPONSE                                                                       | 563                 | 286               | 0.6876   | 1.49E-11 |
| REGULATION OF CELL ADHESION                                                                                  | 629                 | 299               | 0.6650   | 2.44E-11 |
| CELL CELL ADHESION                                                                                           | 608                 | 219               | 0.7553   | 8.85E-11 |
| SIGNALING RECEPTOR ACTIVITY                                                                                  | 1393                | 221               | 0.7510   | 9.25E-11 |
| ADAPTIVE IMMUNE RESPONSE                                                                                     | 288                 | 103               | 1.0987   | 2.11E-10 |
| IMMUNE EFFECTOR PROCESS                                                                                      | 486                 | 235               | 0.7115   | 2.31E-10 |
| REGULATION OF CELL CELL ADHESION                                                                             | 380                 | 182               | 0.8025   | 3.47E-10 |
| SINGLE ORGANISM CELL ADHESION                                                                                | 459                 | 199               | 0.7569   | 5.59E-10 |
| REGULATION OF HOMOTYPIC CELL CELL ADHESION                                                                   | 307                 | 156               | 0.8527   | 7.14E-10 |
| HALLMARK ALLOGRAFT REJECTION                                                                                 | 200                 | 106               | 1.0407   | 8.64E-10 |
| IMMUNE SYSTEM DEVELOPMENT                                                                                    | 582                 | 322               | 0.5842   | 1.04E-09 |
| POSITIVE REGULATION OF CYTOKINE PRODUCTION                                                                   | 370                 | 185               | 0.7677   | 1.32E-09 |
| INNATE IMMUNE RESPONSE                                                                                       | 619                 | 236               | 0.6734   | 1.70E-09 |
| REGULATION OF CELL ACTIVATION                                                                                | 484                 | 236               | 0.6683   | 2.23E-09 |
| B CELL RECEPTOR SIGNALING PATHWAY                                                                            | 54                  | 22                | 2.7246   | 2.21E-09 |
| ACTIVATION OF IMMUNE RESPONSE                                                                                | 427                 | 224               | 0.6854   | 2.32E-09 |
| LEUKOCYTE DIFFERENTIATION                                                                                    | 292                 | 159               | 0.7856   | 8.64E-09 |
| REGULATION OF LYMPHOCYTE DIFFERENTIATION                                                                     | 132                 | 64                | 1.2703   | 1.10E-08 |
| POSITIVE REGULATION OF CELL CELL ADHESION                                                                    | 243                 | 116               | 0.9178   | 1.15E-08 |
| POSITIVE REGULATION OF CELL ADHESION                                                                         | 376                 | 178               | 0.7333   | 1.23E-08 |
| POSITIVE REGULATION OF T CELL PROLIFERATION                                                                  | 95                  | 41                | 1.5843   | 3.18E-08 |
| MEMBRANE MICRODOMAIN                                                                                         | 288                 | 148               | 0.7823   | 3.13E-08 |
| REGULATION OF LEUKOCYTE PROLIFERATION                                                                        | 206                 | 98                | 0.9607   | 4.28E-08 |
| INFLAMMATORY RESPONSE                                                                                        | 454                 | 153               | 0.7588   | 4.66E-08 |
| LEUKOCYTE MEDIATED IMMUNITY                                                                                  | 189                 | 68                | 1.1662   | 4.81E-08 |
| REGULATION OF CYTOKINE SECRETION                                                                             | 149                 | 53                | 1.3284   | 6.23E-08 |
| ANTIGEN RECEPTOR MEDIATED SIGNALING PATHWAY                                                                  | 195                 | 113               | 0.8773   | 6.67E-08 |
| LYMPHOCYTE DIFFERENTIATION                                                                                   | 209                 | 118               | 0.8476   | 9.28E-08 |
| REGULATION OF T CELL DIFFERENTIATION                                                                         | 107                 | 53                | 1.2874   | 1.40E-07 |
| HALLMARK INTERFERON GAMMA RESPONSE                                                                           | 200                 | 130               | 0.7870   | 1.78E-07 |
| POSITIVE REGULATION OF CELL ACTIVATION                                                                       | 311                 | 145               | 0.7420   | 1.91E-07 |
| POSITIVE REGULATION OF LYMPHOCYTE DIFFERENTIATION                                                            | 80                  | 37                | 1.5639   | 2.00E-07 |
| T CELL SELECTION                                                                                             | 36                  | 21                | 2.2329   | 2.65E-07 |
| REGULATION OF LEUKOCYTE MEDIATED IMMUNITY                                                                    | 156                 | 83                | 0.9783   | 2.87E-07 |
| REGULATION OF ALPHA BETA T CELL ACTIVATION                                                                   | 68                  | 34                | 1.6010   | 3.72E-07 |
| T CELL DIFFERENTIATION                                                                                       | 123                 | 74                | 1.0254   | 4.13E-07 |
| REGULATION OF T CELL PROLIFERATION                                                                           | 147                 | 65                | 1.0841   | 5.86E-07 |
| ADAPTIVE IMMUNE RESPONSE BASED ON SOMATIC RECOMBINATION OF IMMUNE RECEPTORS BUILT FROM IMMUNE RECEPTOR GENES | 154                 | 59                | 1.1418   | 6.03E-07 |
| NEGATIVE REGULATION OF LEUKOCYTE MEDIATED IMMUNITY                                                           | 47                  | 25                | 1.8533   | 9.63E-07 |
| NEGATIVE REGULATION OF IMMUNE SYSTEM PROCESS                                                                 | 372                 | 175               | 0.6310   | 1.02E-06 |
| REGULATION OF PROTEIN SECRETION                                                                              | 389                 | 168               | 0.6422   | 1.10E-06 |
| POSITIVE REGULATION OF LEUKOCYTE PROLIFERATION                                                               | 136                 | 63                | 1.0614   | 1.40E-06 |
| NEGATIVE REGULATION OF CYTOKINE PRODUCTION                                                                   | 211                 | 101               | 0.8159   | 1.85E-06 |
| REGULATION OF LEUKOCYTE MIGRATION                                                                            | 149                 | 46                | 1.2420   | 1.99E-06 |
| REGULATION OF LEUKOCYTE DIFFERENTIATION                                                                      | 232                 | 107               | 0.7864   | 2.15E-06 |
| G PROTEIN COUPLED RECEPTOR SIGNALING PATHWAY                                                                 | 1193                | 161               | 0.6335   | 2.49E-06 |
| SIDE OF MEMBRANE                                                                                             | 428                 | 176               | 0.6054   | 2.50E-06 |
| POSITIVE REGULATION OF IMMUNE EFFECTOR PROCESS                                                               | 156                 | 78                | 0.9132   | 3.06E-06 |
| NEGATIVE REGULATION OF SECRETION                                                                             | 200                 | 71                | 0.9473   | 4.04E-06 |
| POSITIVE REGULATION OF LEUKOCYTE DIFFERENTIATION                                                             | 131                 | 63                | 1.0052   | 4.44E-06 |
| REGULATION OF INTERLEUKIN 6 PRODUCTION                                                                       | 104                 | 44                | 1.2128   | 5.29E-06 |
| MYELOID CELL DIFFERENTIATION                                                                                 | 189                 | 111               | 0.7394   | 5.36E-06 |
| NEGATIVE REGULATION OF IMMUNE RESPONSE                                                                       | 121                 | 57                | 1.0456   | 5.95E-06 |
| REGULATION OF T CELL RECEPTOR SIGNALING PATHWAY                                                              | 28                  | 19                | 1.9960   | 6.23E-06 |
| CELL ACTIVATION INVOLVED IN IMMUNE RESPONSE                                                                  | 139                 | 67                | 0.9505   | 7.04E-06 |
| REGULATION OF CYTOSOLIC CALCIUM ION CONCENTRATION                                                            | 203                 | 65                | 0.9500   | 9.72E-06 |
| POSITIVE REGULATION OF ALPHA BETA T CELL ACTIVATION                                                          | 51                  | 26                | 1.5902   | 9.79E-06 |
| REGULATION OF ALPHA BETA T CELL DIFFERENTIATION                                                              | 46                  | 22                | 1.7490   | 1.12E-05 |
| POSITIVE REGULATION OF LEUKOCYTE MIGRATION                                                                   | 109                 | 37                | 1.2777   | 1.22E-05 |
| NEGATIVE REGULATION OF CELL ADHESION                                                                         | 223                 | 99                | 0.7419   | 1.60E-05 |
| REGULATION OF ANTIGEN RECEPTOR MEDIATED SIGNALING PATHWAY                                                    | 41                  | 26                | 1.5387   | 1.69E-05 |
| G PROTEIN COUPLED RECEPTOR ACTIVITY                                                                          | 879                 | 66                | 0.9101   | 1.86E-05 |
| REGULATION OF LYMPHOCYTE MEDIATED IMMUNITY                                                                   | 114                 | 58                | 0.9731   | 1.92E-05 |
| RESPONSE TO ACID CHEMICAL                                                                                    | 319                 | 130               | 0.6361   | 2.09E-05 |
| POSITIVE REGULATION OF SECRETION                                                                             | 370                 | 153               | 0.5853   | 2.11E-05 |
| LEUKOCYTE MIGRATION                                                                                          | 259                 | 98                | 0.7311   | 2.32E-05 |
| PLATELET ACTIVATION                                                                                          | 142                 | 77                | 0.8271   | 2.40E-05 |
| NEGATIVE REGULATION OF LYMPHOCYTE MEDIATED IMMUNITY                                                          | 36                  | 19                | 1.8213   | 2.50E-05 |
| RESPONSE TO MOLECULE OF BACTERIAL ORIGIN                                                                     | 321                 | 139               | 0.6079   | 2.57E-05 |
| NEGATIVE REGULATION OF IMMUNE EFFECTOR PROCESS                                                               | 102                 | 55                | 0.9805   | 2.76E-05 |
| REGULATION OF ADAPTIVE IMMUNE RESPONSE                                                                       | 123                 | 64                | 0.8982   | 3.11E-05 |
| LYMPHOCYTE MEDIATED IMMUNITY                                                                                 | 147                 | 50                | 1.0227   | 3.22E-05 |
| NEGATIVE REGULATION OF CELL ACTIVATION                                                                       | 158                 | 73                | 0.8315   | 3.56E-05 |
| POSITIVE REGULATION OF ALPHA BETA T CELL DIFFERENTIATION                                                     | 37                  | 18                | 1.8363   | 3.64E-05 |
