# Supplementary material
Source: PubMed Central journal article supplement (PMC6857804)
Supplement: NIHMS1057272-supplement-Table_S14.pdf [file NIHMS1057272-supplement-Table_S14.pdf]

**Supplementary Table 14 Gene ontology enrichment analysis of integrated gene expression and DNA methylation in low-grade NF1-glioma.**

| GO Term                                       | originalGeneSetSize | actualGeneSetSize | Genes          | Fold Enrichment | p-value  | q-value  |
|-----------------------------------------------|---------------------|-------------------|----------------|-----------------|----------|----------|
| LEUKOCYTE ACTIVATION                          | 57                  | 6                 | CD48, LYN, STX | 5.88430         | 3.20E-03 | 4.71E+00 |
| CELL ACTIVATION                               | 57                  | 6                 | CD48, LYN, STX | 4.96167         | 6.56E-03 | 9.45E+00 |
| IMMUNE RESPONSE                               | 57                  | 9                 | CORO1A, MYD    | 3.09565         | 7.14E-03 | 1.03E+01 |
| CELL ACTIVATION DURING IMMUNE RESPONSE        | 57                  | 3                 | LYN, STXBP2, L | 19.77778        | 9.69E-03 | 1.37E+01 |
| LEUKOCYTE ACTIVATION DURING IMMUNE RESPONSE   | 57                  | 3                 | LYN, STXBP2, L | 19.77778        | 9.69E-03 | 1.37E+01 |
| PHAGOCYtic CUP                                | 43                  | 2                 | CORO1A, LCP1   | 198.17054       | 9.83E-03 | 1.11E+01 |
| ACTIN CYTOSKELETON                            | 43                  | 5                 | ARPC1B, CORO   | 5.52520         | 1.15E-02 | 1.29E+01 |
| DEFENSE RESPONSE                              | 57                  | 8                 | CD48, CORO1A   | 3.08726         | 1.30E-02 | 1.79E+01 |
| GTPASE ACTIVATOR ACTIVITY                     | 56                  | 5                 | ARHGAP30, HM   | 5.26907         | 1.39E-02 | 1.57E+01 |
| MYELOID LEUKOCYTE ACTIVATION                  | 57                  | 3                 | CD48, LYN, STX | 15.47826        | 1.55E-02 | 2.10E+01 |
| CYTOKINE PRODUCTION                           | 57                  | 3                 | MYD88, LYN, N  | 15.47826        | 1.55E-02 | 2.10E+01 |
| IMMUNE EFFECTOR PROCESS                       | 57                  | 4                 | MYD88, LYN, S  | 7.08458         | 1.80E-02 | 2.39E+01 |
| SH3/SH2 ADAPTOR ACTIVITY                      | 56                  | 3                 | SH2D2A, SKAP2  | 14.19424        | 1.82E-02 | 2.00E+01 |
| REGULATION OF INTRACELLULAR PROTEIN TRANSPORT | 57                  | 3                 | NLRP3, UHMK1   | 13.43396        | 2.03E-02 | 2.66E+01 |
| CYTOKINE SECRETION                            | 57                  | 2                 | LYN, NLRP3     | 67.80952        | 2.86E-02 | 3.55E+01 |
| MAST CELL ACTIVATION                          | 57                  | 2                 | CD48, LYN      | 59.33333        | 3.26E-02 | 3.94E+01 |
| MOLECULAR ADAPTOR ACTIVITY                    | 56                  | 3                 | SH2D2A, SKAP2  | 10.38086        | 3.27E-02 | 3.32E+01 |
| REGULATION OF INTRACELLULAR TRANSPORT         | 57                  | 3                 | NLRP3, UHMK1   | 10.02817        | 3.49E-02 | 4.14E+01 |
| INFLAMMATORY RESPONSE                         | 57                  | 5                 | MYD88, LYN, G  | 3.65128         | 4.53E-02 | 5.03E+01 |
| LEUKOCYTE DEGRANULATION                       | 57                  | 2                 | LYN, STXBP2    | 39.55556        | 4.86E-02 | 5.28E+01 |
| LYMPHOCYTE ACTIVATION                         | 57                  | 4                 | CD48, SKAP2, L | 4.77052         | 4.92E-02 | 5.33E+01 |
| LEUKOCYTE MEDIATED IMMUNITY                   | 57                  | 3                 | MYD88, LYN, S  | 8.27907         | 4.93E-02 | 5.34E+01 |
