# Supplementary material
Source: PubMed Central journal article supplement (PMC6857804)
Supplement: NIHMS1057272-supplement-Table_S15.pdf [file NIHMS1057272-supplement-Table_S15.pdf]

Supplementary Table 15 List of MRs differentially activated in ATRX mutant compared with ATRX wild type high-grade LGM6 glioma.

| MRs      | originalGeneSetCount | actualGeneSetCount | NES    | odd_NES | logit2_NES | p-value   | q-value   | fold activity | p-value_wTest | q-value_wTest |
|----------|----------------------|--------------------|--------|---------|------------|-----------|-----------|---------------|---------------|---------------|
| KTN1     | 122                  | 122                | 0.8338 | 5.0177  | 2.3270     | 3.43E-37  | 8.57E-37  | 0.7088        | 3.20E-05      | 3.24E-02      |
| DST      | 244                  | 244                | 0.8642 | 6.3638  | 2.6699     | 1.17E-85  | 2.92E-84  | 0.8028        | 3.20E-05      | 3.24E-02      |
| CBL      | 162                  | 162                | 0.7905 | 3.7737  | 1.9160     | 2.44E-37  | 6.49E-37  | 0.5946        | 6.77E-05      | 4.57E-02      |
| CHD2     | 162                  | 162                | 0.8563 | 5.9566  | 2.5745     | 2.92E-55  | 1.64E-54  | 0.8084        | 4.46E-04      | 6.17E-02      |
| TRIP11   | 144                  | 144                | 0.7975 | 3.9382  | 1.9775     | 6.08E-35  | 1.31E-34  | 0.5732        | 5.12E-04      | 6.17E-02      |
| NSD1     | 201                  | 201                | 0.8512 | 5.7193  | 2.5158     | 3.76E-66  | 3.36E-65  | 0.6989        | 5.86E-04      | 6.17E-02      |
| GOLGA4   | 110                  | 110                | 0.7543 | 3.0699  | 1.6182     | 2.99E-20  | 4.20E-20  | 0.4770        | 6.69E-04      | 6.17E-02      |
| FOXN3    | 151                  | 151                | 0.7554 | 3.0888  | 1.6270     | 2.20E-27  | 3.76E-27  | 0.5413        | 6.69E-04      | 6.17E-02      |
| MAML2    | 206                  | 206                | 0.8162 | 4.4394  | 2.1503     | 3.01E-55  | 1.64E-54  | 0.6731        | 6.69E-04      | 6.17E-02      |
| KLF13    | 229                  | 229                | 0.8470 | 5.5344  | 2.4684     | 2.77E-73  | 3.85E-72  | 0.6901        | 7.63E-04      | 6.72E-02      |
| PHF3     | 110                  | 110                | 0.8054 | 4.1374  | 2.0487     | 1.75E-28  | 3.08E-28  | 0.6434        | 9.85E-04      | 7.10E-02      |
| PROX1    | 157                  | 157                | 0.7914 | 3.7933  | 1.9234     | 1.89E-36  | 4.38E-36  | 0.6306        | 1.12E-03      | 7.10E-02      |
| HELZ     | 143                  | 143                | 0.8203 | 4.5653  | 2.1907     | 5.72E-40  | 1.79E-39  | 0.6294        | 1.26E-03      | 7.10E-02      |
| NCOR1    | 251                  | 251                | 0.8309 | 4.9126  | 2.2965     | 5.45E-73  | 6.81E-72  | 0.6790        | 1.26E-03      | 7.10E-02      |
| WDFY3    | 202                  | 202                | 0.8612 | 6.2023  | 2.6328     | 3.41E-70  | 3.28E-69  | 0.8037        | 1.42E-03      | 7.59E-02      |
| SKIL     | 101                  | 101                | 0.7891 | 3.7412  | 1.9035     | 9.72E-24  | 1.54E-23  | 0.5295        | 1.60E-03      | 7.73E-02      |
| MGA      | 104                  | 104                | 0.8228 | 4.6424  | 2.2149     | 5.29E-30  | 9.87E-30  | 0.6566        | 1.60E-03      | 7.73E-02      |
| CLIP1    | 191                  | 191                | 0.7662 | 3.2768  | 1.7123     | 6.20E-37  | 1.52E-36  | 0.5252        | 1.80E-03      | 8.29E-02      |
| SLTM     | 207                  | 207                | 0.8063 | 4.1629  | 2.0576     | 3.26E-52  | 1.57E-51  | 0.6257        | 2.26E-03      | 9.75E-02      |
| MYST3    | 191                  | 191                | 0.8434 | 5.3861  | 2.4292     | 2.66E-60  | 1.96E-59  | 0.7271        | 2.26E-03      | 9.75E-02      |
| ROCK1    | 128                  | 128                | 0.8020 | 4.0516  | 2.0185     | 3.54E-32  | 7.37E-32  | 0.5877        | 2.82E-03      | 1.10E-01      |
| ZFHX3    | 230                  | 230                | 0.7971 | 3.9278  | 1.9737     | 1.94E-54  | 1.01E-53  | 0.5965        | 3.14E-03      | 1.20E-01      |
| SON      | 317                  | 317                | 0.7985 | 3.9630  | 1.9866     | 8.57E-75  | 1.34E-73  | 0.6148        | 3.89E-03      | 1.29E-01      |
| CLOCK    | 78                   | 78                 | 0.7697 | 3.3417  | 1.7406     | 1.75E-16  | 2.21E-16  | 0.5196        | 4.31E-03      | 1.30E-01      |
| ZMI2     | 320                  | 320                | 0.7888 | 3.7347  | 1.9010     | 9.24E-71  | 9.63E-70  | 0.5748        | 4.31E-03      | 1.30E-01      |
| GOLGB1   | 247                  | 247                | 0.7485 | 2.9765  | 1.5736     | 2.49E-41  | 8.00E-41  | 0.4877        | 4.77E-03      | 1.33E-01      |
| ARHGEF12 | 188                  | 188                | 0.7465 | 2.9446  | 1.5581     | 1.92E-31  | 3.88E-31  | 0.5261        | 4.77E-03      | 1.33E-01      |
| NCOA3    | 124                  | 124                | 0.7989 | 3.9721  | 1.9899     | 1.30E-30  | 2.50E-30  | 0.6131        | 5.28E-03      | 1.36E-01      |
| MECP2    | 181                  | 181                | 0.7483 | 2.9737  | 1.5723     | 8.93E-31  | 1.77E-30  | 0.4805        | 5.83E-03      | 1.36E-01      |
| THRAP3   | 55                   | 55                 | 0.7801 | 3.5473  | 1.8267     | 6.58E-13  | 7.61E-13  | 0.5530        | 5.83E-03      | 1.36E-01      |
| SP2      | 131                  | 131                | 0.7815 | 3.5777  | 1.8390     | 8.51E-29  | 1.52E-28  | 0.6088        | 5.83E-03      | 1.36E-01      |
| HUWE1    | 245                  | 245                | 0.7566 | 3.1087  | 1.6363     | 1.31E-43  | 4.30E-43  | 0.4819        | 6.43E-03      | 1.37E-01      |
| NCOA2    | 182                  | 182                | 0.7699 | 3.3466  | 1.7427     | 3.07E-36  | 6.98E-36  | 0.5307        | 6.43E-03      | 1.37E-01      |
| MED13L   | 178                  | 178                | 0.7769 | 3.4823  | 1.8000     | 2.99E-37  | 7.63E-37  | 0.5536        | 6.43E-03      | 1.37E-01      |
| AFF4     | 190                  | 190                | 0.7414 | 2.8670  | 1.5195     | 1.58E-30  | 2.99E-30  | 0.4749        | 7.08E-03      | 1.37E-01      |
| FYCO1    | 181                  | 181                | 0.7685 | 3.3198  | 1.7311     | 1.09E-35  | 2.43E-35  | 0.5317        | 7.08E-03      | 1.37E-01      |
| TRIM44   | 219                  | 219                | 0.7947 | 3.8720  | 1.9531     | 3.68E-51  | 1.64E-50  | 0.5668        | 7.08E-03      | 1.37E-01      |
| SPEN     | 178                  | 178                | 0.8172 | 4.4710  | 2.1606     | 2.42E-48  | 1.01E-47  | 0.6775        | 7.08E-03      | 1.37E-01      |
| RSF1     | 205                  | 205                | 0.8390 | 5.2129  | 2.3821     | 5.73E-63  | 4.77E-62  | 0.7405        | 7.78E-03      | 1.40E-01      |
| EP300    | 149                  | 149                | 0.7669 | 3.2897  | 1.7179     | 2.25E-29  | 4.08E-29  | 0.4892        | 9.37E-03      | 1.52E-01      |
| KLF3     | 75                   | 75                 | 0.7809 | 3.5635  | 1.8333     | 3.97E-17  | 5.11E-17  | 0.5176        | 9.37E-03      | 1.52E-01      |
| HOXC13   | 73                   | 73                 | 0.2109 | 0.2672  | -1.9039    | 1.28E-17  | 1.69E-17  | -0.6232       | 9.37E-03      | 1.52E-01      |
| MED7     | 178                  | 178                | 0.2167 | 0.2767  | -1.8537    | 6.61E-39  | 1.97E-38  | -0.5450       | 9.37E-03      | 1.52E-01      |
| SNRBP2   | 112                  | 112                | 0.2284 | 0.2960  | -1.7562    | 2.94E-23  | 4.53E-23  | -0.5265       | 9.37E-03      | 1.52E-01      |
| ING4     | 246                  | 246                | 0.2324 | 0.3027  | -1.7239    | 1.84E-47  | 7.17E-47  | -0.4891       | 9.37E-03      | 1.52E-01      |
| HOXD11   | 35                   | 35                 | 0.2178 | 0.2784  | -1.8449    | 7.46E-09  | 7.83E-09  | -0.6402       | 8.54E-03      | 1.48E-01      |
| AIP      | 179                  | 179                | 0.2510 | 0.3351  | -1.5774    | 1.30E-30  | 2.50E-30  | -0.4528       | 8.54E-03      | 1.48E-01      |
| SCAND1   | 162                  | 162                | 0.1997 | 0.2495  | -2.0027    | 8.88E-40  | 2.71E-39  | -0.5412       | 7.78E-03      | 1.40E-01      |
| RPL27    | 343                  | 343                | 0.1953 | 0.2427  | -2.0427    | 5.45E-84  | 1.14E-82  | -0.6053       | 7.08E-03      | 1.37E-01      |
| NR5A2    | 215                  | 215                | 0.2546 | 0.3415  | -1.5500    | 2.19E-35  | 4.81E-35  | -0.4817       | 7.08E-03      | 1.37E-01      |
| RPL35A   | 210                  | 210                | 0.1924 | 0.2382  | -2.0698    | 2.22E-53  | 1.11E-52  | -0.6220       | 6.43E-03      | 1.37E-01      |
| SNRPC    | 112                  | 112                | 0.1976 | 0.2462  | -2.0221    | 1.88E-28  | 3.27E-28  | -0.5748       | 5.83E-03      | 1.36E-01      |
| SMARCD3  | 179                  | 179                | 0.2217 | 0.2849  | -1.8117    | 8.24E-38  | 2.34E-37  | -0.5116       | 5.83E-03      | 1.36E-01      |
| RNF7     | 154                  | 154                | 0.1998 | 0.2496  | -2.0022    | 6.78E-38  | 1.97E-37  | -0.6505       | 5.28E-03      | 1.36E-01      |
| NDUFA13  | 168                  | 168                | 0.1897 | 0.2341  | -2.0947    | 7.59E-44  | 2.56E-43  | -0.5547       | 5.28E-03      | 1.36E-01      |
| PFDN5    | 350                  | 350                | 0.1805 | 0.2203  | -2.1823    | 5.91E-94  | 2.46E-92  | -0.6159       | 4.77E-03      | 1.33E-01      |
| OGG1     | 107                  | 107                | 0.2426 | 0.3203  | -1.6425    | 3.43E-20  | 4.76E-20  | -0.4900       | 4.77E-03      | 1.33E-01      |
| HSBP1    | 195                  | 195                | 0.1972 | 0.2456  | -2.0256    | 3.11E-48  | 1.25E-47  | -0.6017       | 4.31E-03      | 1.30E-01      |
| EIF3     | 179                  | 179                | 0.1570 | 0.1863  | -2.4245    | 1.63E-56  | 1.07E-55  | -0.6623       | 3.89E-03      | 1.29E-01      |
| CCRN4L   | 205                  | 205                | 0.2418 | 0.3189  | -1.6488    | 2.89E-37  | 7.52E-37  | -0.5092       | 3.89E-03      | 1.29E-01      |
| GTF3A    | 81                   | 81                 | 0.2488 | 0.3312  | -1.5940    | 5.34E-15  | 6.42E-15  | -0.4665       | 3.89E-03      | 1.29E-01      |
| GTF2B    | 221                  | 221                | 0.2204 | 0.2827  | -1.8226    | 1.28E-46  | 4.58E-46  | -0.5469       | 3.50E-03      | 1.27E-01      |
| TCEB2    | 181                  | 181                | 0.1997 | 0.2496  | -2.0023    | 3.40E-44  | 1.18E-43  | -0.5691       | 2.82E-03      | 1.10E-01      |
| CCNH     | 119                  | 119                | 0.2247 | 0.2898  | -1.7868    | 3.07E-25  | 5.12E-25  | -0.5364       | 2.82E-03      | 1.10E-01      |
| HOXA1    | 27                   | 27                 | 0.2233 | 0.2874  | -1.7987    | 6.40E-07  | 6.46E-07  | -0.5324       | 2.53E-03      | 1.07E-01      |
| STRAP    | 123                  | 123                | 0.2253 | 0.2908  | -1.7821    | 6.28E-26  | 1.06E-25  | -0.5637       | 2.26E-03      | 9.75E-02      |
| PFDN1    | 146                  | 146                | 0.1498 | 0.1762  | -2.5050    | 2.17E-48  | 9.35E-48  | -0.7235       | 1.60E-03      | 7.73E-02      |
| SSBP1    | 144                  | 144                | 0.1535 | 0.1814  | -2.4629    | 8.94E-47  | 3.29E-46  | -0.7077       | 1.60E-03      | 7.73E-02      |
| RCHY1    | 215                  | 215                | 0.2017 | 0.2526  | -1.9849    | 1.89E-51  | 8.73E-51  | -0.5465       | 1.42E-03      | 7.59E-02      |
| COX7B    | 285                  | 285                | 0.1301 | 0.1495  | -2.7414    | 1.16E-102 | 1.45E-100 | -0.7622       | 1.26E-03      | 7.10E-02      |
| POLR2K   | 209                  | 209                | 0.1315 | 0.1514  | -2.7237    | 1.88E-75  | 3.35E-74  | -0.7404       | 1.26E-03      | 7.10E-02      |
| HOXC6    | 49                   | 49                 | 0.1728 | 0.2089  | -2.2589    | 2.26E-15  | 2.75E-15  | -0.6904       | 1.26E-03      | 7.10E-02      |
| ZNHIT1   | 281                  | 281                | 0.1569 | 0.1861  | -2.4261    | 2.15E-87  | 6.71E-86  | -0.6861       | 1.26E-03      | 7.10E-02      |
| COP5     | 166                  | 166                | 0.2147 | 0.2734  | -1.8711    | 6.45E-37  | 1.55E-36  | -0.5243       | 1.26E-03      | 7.10E-02      |
| MESP1    | 167                  | 167                | 0.2169 | 0.2770  | -1.8519    | 1.43E-36  | 3.37E-36  | -0.5164       | 1.26E-03      | 7.10E-02      |
| POLR3K   | 181                  | 181                | 0.1601 | 0.1906  | -2.3910    | 3.98E-56  | 2.37E-55  | -0.6727       | 9.85E-04      | 7.10E-02      |
| ZNF593   | 201                  | 201                | 0.1744 | 0.2112  | -2.2432    | 3.96E-57  | 2.75E-56  | -0.6304       | 9.85E-04      | 7.10E-02      |
| ELK1     | 127                  | 127                | 0.2453 | 0.3251  | -1.6210    | 3.51E-23  | 5.35E-23  | -0.5029       | 9.85E-04      | 7.10E-02      |
| CNBP     | 143                  | 143                | 0.2048 | 0.2576  | -1.9570    | 3.35E-34  | 7.09E-34  | -0.6007       | 6.69E-04      | 6.17E-02      |
| PRPF19   | 98                   | 98                 | 0.2269 | 0.2934  | -1.7689    | 8.86E-21  | 1.28E-20  | -0.5151       | 6.69E-04      | 6.17E-02      |
| CIQBP    | 184                  | 184                | 0.1449 | 0.1694  | -2.5614    | 4.37E-62  | 3.41E-61  | -0.6908       | 5.86E-04      | 6.17E-02      |
| SEC13    | 146                  | 146                | 0.1936 | 0.2401  | -2.0584    | 1.90E-37  | 5.17E-37  | -0.6835       | 5.12E-04      | 6.17E-02      |
| MED31    | 317                  | 317                | 0.1510 | 0.1778  | -2.4913    | 1.53E-101 | 9.55E-100 | -0.6612       | 5.12E-04      | 6.17E-02      |
| BRF2     | 105                  | 105                | 0.2117 | 0.2686  | -1.8964    | 1.76E-24  | 2.90E-24  | -0.5867       | 5.12E-04      | 6.17E-02      |
| MRPL24   | 142                  | 142                | 0.2133 | 0.2712  | -1.8826    | 3.87E-32  | 7.94E-32  | -0.5265       | 3.87E-04      | 6.17E-02      |
| ZNHIT3   | 227                  | 227                | 0.1533 | 0.1810  | -2.4657    | 1.45E-72  | 1.65E-71  | -0.6791       | 2.15E-04      | 6.17E-02      |
| TCEB1    | 162                  | 162                | 0.1402 | 0.1631  | -2.6161    | 2.54E-56  | 1.59E-55  | -0.7758       | 1.84E-04      | 6.17E-02      |
| SUPT4H1  | 161                  | 161                | 0.1699 | 0.2046  | -2.2888    | 2.01E-47  | 7.62E-47  | -0.6592       | 1.13E-04      | 4.60E-02      |
| POLR21   | 129                  | 129                | 0.1733 | 0.2097  | -2.2538    | 1.26E-37  | 3.49E-37  | -0.6340       | 1.13E-04      | 4.60E-02      |
