# Supplementary material
Source: PubMed Central journal article supplement (PMC6857804)
Supplement: NIHMS1057272-supplement-Table_S16a.pdf [file NIHMS1057272-supplement-Table_S16a.pdf]

Supplementary Table 16 Gene ontology enrichment analysis of MRs differentially activated in ATRX mutant compared with ATRX wild type LGM6 glioma.

Supplementary Table 16a Gene ontology terms significantly enriched for the inferred targets of the 10 most active MRs in ATRX mutant.

| GO Term                                                              | originalGeneSetSize | actualGeneSetSize | Genes                         | Fold Enrichment | p-value  | q-value  |
|----------------------------------------------------------------------|---------------------|-------------------|-------------------------------|-----------------|----------|----------|
| NON-MEMBRANE-BOUNDED ORGANELLE                                       | 552                 | 205               | ALS2, TGOLN2, CTTNBP2N        | 1.83            | 7.91E-21 | 1.12E-17 |
| INTRACELLULAR NON-MEMBRANE-BOUNDED ORGANELLE                         | 552                 | 205               | ALS2, TGOLN2, CTTNBP2N        | 1.83            | 7.91E-21 | 1.12E-17 |
| TRANSCRIPTION                                                        | 665                 | 184               | EIF2C2, EIF2C1, ARNT2, HIRA   | 1.78            | 2.84E-16 | 5.88E-13 |
| REGULATION OF TRANSCRIPTION                                          | 665                 | 212               | EIF2C2, EIF2C1, HIRA, ZNF638  | 1.66            | 1.79E-15 | 3.13E-12 |
| CYTOSKELETON                                                         | 552                 | 123               | CTTNBP2NL, ALS2, DYNC1L1      | 2.06            | 2.74E-15 | 3.92E-12 |
| MICROTUBULE CYTOSKELETON                                             | 552                 | 67                | ALS2, DYNC1L12, KIAA0368      | 2.83            | 2.15E-14 | 3.03E-11 |
| ZINC ION BINDING                                                     | 652                 | 187               | PLEKHM1, ZXDB, ZNF638, ZNF639 | 1.61            | 2.55E-12 | 3.84E-09 |
| DNA BINDING                                                          | 652                 | 186               | PRR12, ARNT2, HIRA, ZNF638    | 1.59            | 1.10E-11 | 1.65E-08 |
| CHROMATIN MODIFICATION                                               | 665                 | 43                | RSF1, SETD1B, HIRA, TRRAP     | 3.19            | 4.00E-11 | 7.07E-08 |
| CYTOSKELETAL PART                                                    | 552                 | 84                | ALS2, DYNC1L12, KIAA0368      | 2.04            | 3.45E-10 | 4.87E-07 |
| NUCLEAR LUMEN                                                        | 552                 | 112               | TGOLN2, ARNT2, ZNF638         | 1.79            | 6.42E-10 | 9.07E-07 |
| CHROMOSOME ORGANIZATION                                              | 665                 | 57                | RSF1, ARID4B, HIRA, BRPF1     | 2.39            | 1.86E-09 | 3.28E-06 |
| TRANSCRIPTION FACTOR BINDING                                         | 652                 | 59                | ARNT2, HIRA, ZEB1, FOXO3      | 2.29            | 4.45E-09 | 6.69E-06 |
| TRANSITION METAL ION BINDING                                         | 652                 | 201               | PDP2, PLEKHM1, ZNF638, ZNF639 | 1.44            | 9.04E-09 | 1.36E-05 |
| CHROMATIN ORGANIZATION                                               | 665                 | 47                | RSF1, SETD1B, ARID4B, HIRA    | 2.53            | 1.10E-08 | 1.95E-05 |
| NUCLEOPLASM PART                                                     | 552                 | 55                | ARNT2, YLPM1, ZNF638, ZNF639  | 2.29            | 1.54E-08 | 2.18E-05 |
| HEART DEVELOPMENT                                                    | 665                 | 32                | RBP4, BBS5, PRKDC, SOX6       | 3.03            | 6.42E-08 | 1.13E-04 |
| CELL PROJECTION                                                      | 552                 | 62                | GNA13, ALS2, ADCY4, SH3BP1    | 2.06            | 8.63E-08 | 1.22E-04 |
| CELLULAR COMPONENT MORPHOGENESIS                                     | 665                 | 46                | ALS2, BBS5, SSH1, SHROCK4     | 2.36            | 1.33E-07 | 2.35E-04 |
| NUCLEOPLASM                                                          | 552                 | 72                | ARNT2, YLPM1, ZEB1, ZNF638    | 1.89            | 1.94E-07 | 2.73E-04 |
| REGULATION OF TRANSCRIPTION FROM RNA POLYMERASE                      | 665                 | 69                | PPARA, ARNT2, HIRA, ZEB1      | 1.93            | 1.84E-07 | 3.25E-04 |
| TRANSCRIPTION REGULATOR ACTIVITY                                     | 652                 | 120               | ARNT2, HIRA, FOXO3, FOXO4     | 1.58            | 2.43E-07 | 3.66E-04 |
| CELL MORPHOGENESIS                                                   | 665                 | 42                | ALS2, BBS5, SSH1, SHROCK4     | 2.40            | 3.16E-07 | 5.58E-04 |
| GTPASE REGULATOR ACTIVITY                                            | 652                 | 46                | ALS2, USP6, RABGAP1, RABGAP2  | 2.27            | 3.95E-07 | 5.94E-04 |
| POSITIVE REGULATION OF TRANSCRIPTION                                 | 665                 | 57                | PPARA, RSF1, ARNT2, FOXO3     | 2.06            | 3.57E-07 | 6.30E-04 |
| MICROTUBULE ORGANIZING CENTER                                        | 552                 | 31                | ALS2, PPP4R2, BBS5, RAB11     | 2.84            | 4.77E-07 | 6.73E-04 |
| METAL ION BINDING                                                    | 652                 | 267               | ADCY4, EIF2C2, PDP2, PLEKHM1  | 1.28            | 4.65E-07 | 6.99E-04 |
| MICROTUBULE-BASED MOVEMENT                                           | 665                 | 21                | KIF3B, KIF3A, OPA1, KIF5B     | 3.78            | 5.33E-07 | 9.40E-04 |
| NUCLEOSIDE-TRIPHOSPHATASE REGULATOR ACTIVITY                         | 652                 | 46                | ALS2, USP6, RABGAP1, RABGAP2  | 2.22            | 7.32E-07 | 1.10E-03 |
| NEGATIVE REGULATION OF GENE EXPRESSION                               | 665                 | 52                | PPARA, EIF2C2, RSF1, EIF2C1   | 2.10            | 7.01E-07 | 1.24E-03 |
| MICROTUBULE-BASED PROCESS                                            | 665                 | 33                | KIF13A, PTK2, MACF1, KIF13B   | 2.65            | 8.26E-07 | 1.46E-03 |
| POSITIVE REGULATION OF GENE EXPRESSION                               | 665                 | 57                | PPARA, RSF1, ARNT2, FOXO3     | 2.00            | 9.35E-07 | 1.65E-03 |
| CHORDATE EMBRYONIC DEVELOPMENT                                       | 665                 | 39                | ALS2, GNA13, ZFAND5, RAB11    | 2.40            | 9.40E-07 | 1.66E-03 |
| CATION BINDING                                                       | 652                 | 267               | ADCY4, EIF2C2, PDP2, PLEKHM1  | 1.27            | 1.12E-06 | 1.68E-03 |
| CELL PART MORPHOGENESIS                                              | 665                 | 33                | ALS2, BBS5, COX10, MYO5A      | 2.62            | 1.08E-06 | 1.90E-03 |
| EMBRYONIC DEVELOPMENT ENDING IN BIRTH OR EGG HATCHING                | 665                 | 39                | ALS2, GNA13, ZFAND5, RAB11    | 2.38            | 1.17E-06 | 2.06E-03 |
| NEURON PROJECTION                                                    | 552                 | 36                | MYO5A, ALS2, ADCY4, GRB2      | 2.44            | 1.83E-06 | 2.59E-03 |
| ION BINDING                                                          | 652                 | 269               | ADCY4, EIF2C2, PDP2, PLEKHM1  | 1.26            | 1.88E-06 | 2.82E-03 |
| REGULATION OF TRANSCRIPTION, DNA-DEPENDENT                           | 665                 | 130               | ARNT2, HIRA, FOXO3, FOXO4     | 1.49            | 1.73E-06 | 3.06E-03 |
| CYTOSKELETON ORGANIZATION                                            | 665                 | 46                | ABLIM1, SSH1, SHROOM4         | 2.15            | 1.86E-06 | 3.29E-03 |
| POSITIVE REGULATION OF NUCLEOBASE, NUCLEOSIDE, NUCLEOTIDE METABOLISM | 665                 | 59                | PPARA, RSF1, ARNT2, FOXO3     | 1.92            | 1.91E-06 | 3.37E-03 |
| MICROTUBULE                                                          | 552                 | 31                | DYNC1L12, KIF13A, INCENP      | 2.62            | 2.57E-06 | 3.63E-03 |
| CYTOSKELETAL PROTEIN BINDING                                         | 652                 | 51                | HIP1R, TLN2, FER, PACSIN1     | 2.01            | 2.88E-06 | 4.33E-03 |
| INTRACELLULAR ORGANELLE LUMEN                                        | 552                 | 116               | TGOLN2, PDP2, ARNT2, ZNF638   | 1.51            | 3.25E-06 | 4.60E-03 |
| ATP BINDING                                                          | 652                 | 113               | ADCY4, DYNC1L12, PRPF4B       | 1.52            | 3.70E-06 | 5.56E-03 |
| MICROTUBULE MOTOR ACTIVITY                                           | 652                 | 16                | KIF3B, KIF3A, KIF5B, KIF5A    | 4.14            | 5.27E-06 | 7.92E-03 |
| CHROMATIN BINDING                                                    | 652                 | 23                | SATB2, SVEP1, UPF1, MLL2      | 3.05            | 5.50E-06 | 8.27E-03 |
| TRANSCRIPTION COFACTOR ACTIVITY                                      | 652                 | 40                | HIRA, HCF1, ZEB1, TRRAP       | 2.19            | 5.73E-06 | 8.61E-03 |
| POSITIVE REGULATION OF NITROGEN COMPOUND METABOLISM                  | 665                 | 59                | PPARA, RSF1, ARNT2, FOXO3     | 1.86            | 5.14E-06 | 9.07E-03 |
| IN UTERO EMBRYONIC DEVELOPMENT                                       | 665                 | 25                | ALS2, GNA13, ZFAND5, RAB11    | 2.89            | 5.32E-06 | 9.39E-03 |
| REGULATION OF RNA METABOLIC PROCESS                                  | 665                 | 130               | ARNT2, HIRA, FOXO3, FOXO4     | 1.46            | 5.45E-06 | 9.62E-03 |
