# Supplementary material
Source: PubMed Central journal article supplement (PMC6857804)
Supplement: NIHMS1057272-supplement-Table_S16b.pdf [file NIHMS1057272-supplement-Table_S16b.pdf]

Supplementary Table 16 Gene ontology enrichment analysis of MRs differentially activated in ATRX mutant compared with ATRX wild type LGM6 glioma.  
 Supplementary Table 16b Gene ontology terms significantly enriched for the inferred targets of the 10 most active MRs in ATRX wild type.

| GO Term                                                                                        | originalGeneSetSize | actualGeneSetSize | Genes         | Fold Enrichment | p-value  | q-value  |
|------------------------------------------------------------------------------------------------|---------------------|-------------------|---------------|-----------------|----------|----------|
| STRUCTURAL CONSTITUENT OF RIBOSOME                                                             | 706                 | 105               | RPL18, MRPS   | 11.49           | 1.21E-89 | 1.84E-86 |
| RIBOSOME                                                                                       | 757                 | 119               | MRPL40, RPL   | 9.35            | 9.12E-89 | 1.30E-85 |
| MITOCHONDRION                                                                                  | 757                 | 236               | MRPL40, MR    | 3.67            | 1.79E-77 | 2.55E-74 |
| RIBOSOMAL SUBUNIT                                                                              | 757                 | 86                | MRPS36, RPL   | 11.34           | 8.76E-74 | 1.25E-70 |
| TRANSLATION                                                                                    | 762                 | 127               | EIF6, RPL18,  | 6.81            | 6.52E-73 | 1.14E-69 |
| RIBONUCLEOPROTEIN COMPLEX                                                                      | 757                 | 151               | MRPS36, RPL   | 4.95            | 7.70E-66 | 1.10E-62 |
| MITOCHONDRIAL PART                                                                             | 757                 | 162               | MRPS36, MR    | 4.60            | 7.95E-66 | 1.13E-62 |
| TRANSLATIONAL ELONGATION                                                                       | 762                 | 64                | RPL18, RPL3   | 11.25           | 1.80E-53 | 3.13E-50 |
| CYTOSOLIC RIBOSOME                                                                             | 757                 | 57                | RPL18, RPL13  | 11.88           | 3.01E-50 | 4.29E-47 |
| MITOCHONDRIAL INNER MEMBRANE                                                                   | 757                 | 101               | NDUJFAB1, S   | 5.57            | 1.79E-48 | 2.55E-45 |
| MITOCHONDRIAL ENVELOPE                                                                         | 757                 | 115               | TSPO, NDUJF   | 4.63            | 3.11E-46 | 4.43E-43 |
| ORGANELLE INNER MEMBRANE                                                                       | 757                 | 102               | EIF6, NDUJFA  | 5.23            | 3.86E-46 | 5.50E-43 |
| MITOCHONDRIAL MEMBRANE                                                                         | 757                 | 111               | TSPO, NDUJF   | 4.76            | 8.80E-46 | 1.25E-42 |
| CYTOSOLIC PART                                                                                 | 757                 | 66                | RPL18, RPL13  | 7.33            | 5.95E-40 | 8.48E-37 |
| LARGE RIBOSOMAL SUBUNIT                                                                        | 757                 | 45                | RPL18, MRPL   | 11.34           | 3.91E-38 | 5.57E-35 |
| MITOCHONDRIAL MEMBRANE PART                                                                    | 757                 | 57                | UQCRC2, TIM   | 7.70            | 7.29E-36 | 1.04E-32 |
| SMALL RIBOSOMAL SUBUNIT                                                                        | 757                 | 42                | MRPS36, MR    | 11.26           | 2.33E-35 | 3.32E-32 |
| ORGANELLE ENVELOPE                                                                             | 757                 | 125               | EIF6, TSPO, N | 3.40            | 2.62E-35 | 3.74E-32 |
| ENVELOPE                                                                                       | 757                 | 125               | EIF6, TSPO, N | 3.39            | 3.68E-35 | 5.24E-32 |
| ORGANELLAR RIBOSOME                                                                            | 757                 | 36                | MRPS36, MR    | 12.66           | 4.44E-33 | 6.32E-30 |
| MITOCHONDRIAL RIBOSOME                                                                         | 757                 | 36                | MRPS36, MR    | 12.66           | 4.44E-33 | 6.32E-30 |
| STRUCTURAL MOLECULE ACTIVITY                                                                   | 706                 | 114               | RPL18, MRPS   | 3.31            | 8.16E-31 | 1.25E-27 |
| GENERATION OF PRECURSOR METABOLITES AND ENERGY                                                 | 762                 | 78                | UQCRC2, LDH   | 4.42            | 1.93E-29 | 3.36E-26 |
| RESPIRATORY CHAIN                                                                              | 757                 | 40                | UQCRC2, ND    | 9.01            | 2.02E-28 | 2.88E-25 |
| OXIDATIVE PHOSPHORYLATION                                                                      | 762                 | 44                | UQCRC2, ND    | 7.97            | 3.47E-28 | 6.04E-25 |
| ELECTRON TRANSPORT CHAIN                                                                       | 762                 | 45                | UQCRC2, ND    | 7.01            | 5.29E-26 | 9.21E-23 |
| CYTOSOLIC SMALL RIBOSOMAL SUBUNIT                                                              | 757                 | 29                | MRPS36, RPS   | 12.24           | 7.04E-26 | 1.50E-22 |
| MITOCHONDRIAL RESPIRATORY CHAIN                                                                | 757                 | 35                | UQCRC2, ND    | 9.23            | 2.43E-23 | 3.47E-22 |
| ORGANELLE MEMBRANE                                                                             | 757                 | 152               | EIF6, TSPO, V | 2.34            | 2.34E-24 | 3.34E-21 |
| CYTOSOL                                                                                        | 757                 | 172               | ITGB3BP, RP   | 2.18            | 2.81E-24 | 4.00E-21 |
| CYTOSOLIC LARGE RIBOSOMAL SUBUNIT                                                              | 757                 | 27                | RPL18, RPL13  | 12.00           | 1.04E-23 | 1.48E-20 |
| NADH DEHYDROGENASE (UBIQUINONE) ACTIVITY                                                       | 706                 | 27                | NDUJF3, ND    | 11.55           | 1.38E-22 | 2.11E-19 |
| NADH DEHYDROGENASE ACTIVITY                                                                    | 706                 | 27                | NDUJF3, ND    | 11.55           | 1.38E-22 | 2.11E-19 |
| NADH DEHYDROGENASE (QUINONE) ACTIVITY                                                          | 706                 | 27                | NDUJF3, ND    | 11.55           | 1.38E-22 | 2.11E-19 |
| MITOCHONDRIAL RESPIRATORY CHAIN COMPLEX I                                                      | 757                 | 27                | NDUJF3, ND    | 10.85           | 5.06E-22 | 7.21E-19 |
| RESPIRATORY CHAIN COMPLEX I                                                                    | 757                 | 27                | NDUJF3, ND    | 10.85           | 5.06E-22 | 7.21E-19 |
| NADH DEHYDROGENASE COMPLEX                                                                     | 757                 | 27                | NDUJF3, ND    | 10.85           | 5.06E-22 | 7.21E-19 |
| MITOCHONDRIAL ELECTRON TRANSPORT, NADH TO UBIQUINONE                                           | 762                 | 26                | NDUJF3, ND    | 10.99           | 3.82E-21 | 6.65E-18 |
| RNA BINDING                                                                                    | 706                 | 105               | RPL18, RPL3   | 2.69            | 4.77E-21 | 7.28E-18 |
| CELLULAR RESPIRATION                                                                           | 762                 | 37                | UQCRC2, ND    | 6.77            | 7.96E-21 | 1.39E-17 |
| OXIDOREDUCTASE ACTIVITY, ACTING ON NADH OR NADPH, QUINONE OR SIMILAR COMPOUND AS ACCEPTOR      | 706                 | 27                | NDUJF3, ND    | 10.13           | 1.38E-20 | 2.11E-17 |
| MITOCHONDRIAL LUMEN                                                                            | 757                 | 56                | MRPS36, MR    | 4.17            | 5.59E-20 | 7.97E-17 |
| MITOCHONDRIAL MATRIX                                                                           | 757                 | 56                | MRPS36, MR    | 4.17            | 5.59E-20 | 7.97E-17 |
| ATP SYNTHESIS COUPLED ELECTRON TRANSPORT                                                       | 762                 | 28                | NDUJF3, ND    | 8.88            | 1.68E-19 | 2.93E-16 |
| MITOCHONDRIAL ATP SYNTHESIS COUPLED ELECTRON TRANSPORT                                         | 762                 | 28                | NDUJF3, ND    | 8.88            | 1.68E-19 | 2.93E-16 |
| RESPIRATORY ELECTRON TRANSPORT CHAIN                                                           | 762                 | 29                | NDUJF3, ND    | 8.04            | 9.39E-19 | 1.64E-15 |
| MEMBRANE-ENCLOSED LUMEN                                                                        | 757                 | 19                | ITGB3BP, RP   | 1.80            | 3.89E-18 | 5.58E-15 |
| ENERGY DERIVATION BY OXIDATION OF ORGANIC COMPOUNDS                                            | 762                 | 40                | UQCRC2, ND    | 9.23            | 2.43E-17 | 3.47E-14 |
| INTRACELLULAR ORGANELLE LUMEN                                                                  | 706                 | 186               | EIF6, MRPS3   | 1.77            | 9.13E-16 | 1.27E-12 |
| OXIDOREDUCTASE ACTIVITY, ACTING ON NADH OR NADPH                                               | 706                 | 29                | NDUJF3, ND    | 6.43            | 1.30E-15 | 2.03E-12 |
| HYDROGEN ION TRANSMEMBRANE TRANSPORTER ACTIVITY                                                | 706                 | 30                | ATP6V0E1, C   | 6.13            | 1.69E-15 | 2.54E-12 |
| ORGANELLE LUMEN                                                                                | 757                 | 187               | EIF6, MRPS3   | 1.73            | 4.16E-15 | 6.01E-12 |
| MONOVALENT INORGANIC CATION TRANSMEMBRANE TRANSPORTER ACTIVITY                                 | 706                 | 30                | ATP6V0E1, C   | 5.30            | 1.13E-13 | 1.73E-10 |
| ORGANELLAR LARGE RIBOSOMAL SUBUNIT                                                             | 757                 | 14                | MRPL1, MRP    | 13.13           | 6.38E-13 | 9.09E-10 |
| MITOCHONDRIAL LARGE RIBOSOMAL SUBUNIT                                                          | 757                 | 14                | MRPL1, MRP    | 13.13           | 6.38E-13 | 9.09E-10 |
| NCRNA PROCESSING                                                                               | 762                 | 40                | HSD17B10, P   | 3.80            | 6.84E-13 | 1.19E-09 |
| RNA PROCESSING                                                                                 | 762                 | 74                | RPL36A, RPL   | 2.40            | 3.30E-12 | 5.74E-09 |
| RIBOSOME BIOGENESIS                                                                            | 762                 | 31                | EIF6, RPL14,  | 4.51            | 3.90E-12 | 6.80E-09 |
| RIBONUCLEOPROTEIN COMPLEX BIOGENESIS                                                           | 762                 | 38                | EIF6, RPL14,  | 3.75            | 4.26E-12 | 7.41E-09 |
| OXIDATION REDUCTION                                                                            | 762                 | 80                | UQCRC2, SEF   | 2.22            | 2.08E-11 | 3.62E-08 |
| ANAPHASE-PROMOTING COMPLEX-DEPENDENT PROTEASOMAL UBIQUITIN-DEPENDENT PROTEIN CATABOLIC PROCESS | 762                 | 22                | ANAPC10, CE   | 6.01            | 2.50E-11 | 4.34E-08 |
| NEGATIVE REGULATION OF UBIQUITIN-PROTEIN LIGASE ACTIVITY DURING MITOTIC CELL CYCLE             | 762                 | 22                | ANAPC10, CE   | 6.01            | 2.50E-11 | 4.34E-08 |
| THREONINE-TYPE ENDOPEPTIDASE ACTIVITY                                                          | 706                 | 13                | PSMA7, PSM    | 11.95           | 5.06E-11 | 7.72E-08 |
| THREONINE-TYPE PEPTIDASE ACTIVITY                                                              | 706                 | 13                | PSMA7, PSM    | 11.95           | 5.06E-11 | 7.72E-08 |
| NEGATIVE REGULATION OF UBIQUITIN-PROTEIN LIGASE ACTIVITY                                       | 762                 | 22                | ANAPC10, CE   | 5.83            | 4.79E-11 | 8.34E-08 |
| NEGATIVE REGULATION OF LIGASE ACTIVITY                                                         | 762                 | 22                | ANAPC10, CE   | 5.83            | 4.79E-11 | 8.34E-08 |
| NEGATIVE REGULATION OF PROTEIN UBIQUITINATION                                                  | 762                 | 22                | ANAPC10, CE   | 5.83            | 4.79E-11 | 8.34E-08 |
| POSITIVE REGULATION OF UBIQUITIN-PROTEIN LIGASE ACTIVITY DURING MITOTIC CELL CYCLE             | 762                 | 22                | ANAPC10, CE   | 5.74            | 6.57E-11 | 1.04E-07 |
| PROTEASOME CORE COMPLEX                                                                        | 757                 | 13                | PSMA7, PSM    | 10.98           | 1.37E-10 | 1.95E-07 |
| POSITIVE REGULATION OF UBIQUITIN-PROTEIN LIGASE ACTIVITY                                       | 762                 | 22                | ANAPC10, CE   | 5.58            | 1.21E-10 | 2.11E-07 |
| NCRNA METABOLIC PROCESS                                                                        | 762                 | 41                | HSD17B10, E   | 3.16            | 1.37E-10 | 2.38E-07 |
| REGULATION OF UBIQUITIN-PROTEIN LIGASE ACTIVITY DURING MITOTIC CELL CYCLE                      | 762                 | 22                | ANAPC10, CE   | 5.50            | 1.63E-10 | 2.84E-07 |
| POSITIVE REGULATION OF LIGASE ACTIVITY                                                         | 762                 | 22                | ANAPC10, CE   | 5.35            | 2.90E-10 | 5.06E-07 |
| INTRACELLULAR NON-MEMBRANE-BOUNDED ORGANELLE                                                   | 757                 | 224               | ITGB3BP, RP   | 1.46            | 3.71E-10 | 5.29E-07 |
| NON-MEMBRANE-BOUNDED ORGANELLE                                                                 | 757                 | 224               | ITGB3BP, RP   | 1.46            | 3.71E-10 | 5.29E-07 |
| INORGANIC CATION TRANSMEMBRANE TRANSPORTER ACTIVITY                                            | 706                 | 31                | ATP6V0E1, C   | 7.78            | 4.68E-10 | 7.14E-07 |
| MITOCHONDRIAL SMALL RIBOSOMAL SUBUNIT                                                          | 757                 | 12                | MRPS36, MR    | 11.26           | 6.27E-10 | 8.93E-07 |
| ORGANELLAR SMALL RIBOSOMAL SUBUNIT                                                             | 757                 | 12                | MRPS36, MR    | 11.26           | 6.27E-10 | 8.93E-07 |
| POSITIVE REGULATION OF PROTEIN UBIQUITINATION                                                  | 762                 | 23                | NDJF1, ANA    | 4.86            | 8.02E-10 | 1.40E-06 |
| RRNA PROCESSING                                                                                | 762                 | 24                | RPL35A, RPL   | 4.63            | 9.01E-10 | 1.57E-06 |
| PROTON-TRANSPORTING ATP SYNTHASE COMPLEX, COUPLING FACTOR F(0)                                 | 757                 | 11                | ATP5J2, ATP   | 12.38           | 1.13E-09 | 1.61E-06 |
| REGULATION OF PROTEIN UBIQUITINATION                                                           | 762                 | 25                | NDJF1, ANA    | 4.44            | 9.57E-10 | 1.67E-06 |
| REGULATION OF UBIQUITIN-PROTEIN LIGASE ACTIVITY                                                | 762                 | 22                | ANAPC10, CE   | 5.01            | 1.12E-09 | 1.95E-06 |
| PROTEASOMAL UBIQUITIN-DEPENDENT PROTEIN CATABOLIC PROCESS                                      | 762                 | 25                | DERL2, ANAF   | 4.35            | 1.47E-09 | 2.57E-06 |
| PROTEASOMAL PROTEIN CATABOLIC PROCESS                                                          | 762                 | 25                | DERL2, ANAF   | 4.35            | 1.47E-09 | 2.57E-06 |
| PROTON-TRANSPORTING TWO-SECTOR ATPASE COMPLEX, PROTON-TRANSPORTING DOMAIN                      | 757                 | 13                | ATP5J2, ATP   | 9.15            | 2.35E-09 | 3.35E-06 |
| PROTON-TRANSPORTING TWO-SECTOR ATPASE COMPLEX                                                  | 757                 | 17                | ATP5J2, ATP   | 6.38            | 2.46E-09 | 3.51E-06 |
| RNA METABOLIC PROCESS                                                                          | 762                 | 24                | RPL35A, RPL   | 4.44            | 2.23E-09 | 3.86E-06 |
| REGULATION OF LIGASE ACTIVITY                                                                  | 762                 | 22                | ANAPC10, CE   | 4.82            | 2.38E-09 | 4.14E-06 |
| PROTON-TRANSPORTING ATP SYNTHASE COMPLEX                                                       | 757                 | 12                | ATP5J2, ATP   | 9.65            | 5.89E-09 | 8.40E-06 |
| PROTEASOME COMPLEX                                                                             | 757                 | 19                | PSMA7, PSM    | 5.26            | 7.58E-09 | 1.08E-05 |
| MITOCHONDRION ORGANIZATION                                                                     | 762                 | 28                | BID, TSPO, S  | 3.60            | 1.06E-08 | 1.84E-05 |
| MITOCHONDRIAL PROTON-TRANSPORTING ATP SYNTHASE COMPLEX                                         | 757                 | 11                | ATP5J2, ATP   | 9.78            | 2.80E-08 | 3.99E-05 |
| NEGATIVE REGULATION OF PROTEIN MODIFICATION PROCESS                                            | 762                 | 25                | TAF7, ANAP    | 3.73            | 3.76E-08 | 6.55E-05 |
| OXIDOREDUCTASE ACTIVITY, ACTING ON HEME GROUP OF DONORS, OXYGEN AS ACCEPTOR                    | 706                 | 12                | COX7A2, COX   | 7.88            | 1.03E-07 | 1.57E-04 |
| OXIDOREDUCTASE ACTIVITY, ACTING ON HEME GROUP OF DONORS                                        | 706                 | 12                | COX7A2, COX   | 7.88            | 1.03E-07 | 1.57E-04 |
| CYTOCHROME-C OXIDASE ACTIVITY                                                                  | 706                 | 12                | COX7A2, COX   | 7.88            | 1.03E-07 | 1.57E-04 |
| HEME-COPPER TERMINAL OXIDASE ACTIVITY                                                          | 706                 | 12                | COX7A2, COX   | 7.88            | 1.03E-07 | 1.57E-04 |
| RRNA BINDING                                                                                   | 706                 | 12                | MRPL11, MR    | 7.61            | 1.58E-07 | 2.41E-04 |
| ATP SYNTHESIS COUPLED PROTON TRANSPORT                                                         | 762                 | 14                | ATP6V1C2, A   | 6.21            | 1.49E-07 | 2.59E-04 |
| ENERGY COUPLED PROTON TRANSPORT, DOWN ELECTROCHEMICAL GRADIENT                                 | 762                 | 14                | ATP6V1C2, A   | 6.21            | 1.49E-07 | 2.59E-04 |
| PROTON TRANSPORT                                                                               | 762                 | 16                | ATP6V0E1, A   | 4.66            | 9.69E-07 | 1.69E-03 |
| TRANSLATION REGULATOR ACTIVITY                                                                 | 706                 | 11                | MRPL11, DA2   | 6.98            | 1.63E-06 | 2.49E-03 |
| PROTEIN LOCALIZATION IN MITOCHONDRION                                                          | 762                 | 12                | BID, TSPO, T  | 6.27            | 1.44E-06 | 2.51E-03 |
| PROTEIN TARGETING TO MITOCHONDRION                                                             | 762                 | 12                | BID, TSPO, T  | 6.27            | 1.44E-06 | 2.51E-03 |
| HYDROGEN TRANSPORT                                                                             | 762                 | 16                | ATP6V0E1, A   | 4.51            | 1.51E-06 | 2.63E-03 |
| IRON-SULFUR CLUSTER BINDING                                                                    | 706                 | 14                | FOX1, UQCRC   | 5.13            | 1.75E-06 | 2.67E-03 |
| METAL CLUSTER BINDING                                                                          | 706                 | 14                | FOX1, UQCRC   | 5.13            | 1.75E-06 | 2.67E-03 |
| RNA ELONGATION FROM RNA POLYMERASE II PROMOTER                                                 | 762                 | 14                | POLR2H, POL   | 5.18            | 1.57E-06 | 2.74E-03 |
| NUCLEAR LUMEN                                                                                  | 757                 | 128               | EIF6, ITGB3B  | 1.49            | 2.43E-06 | 3.46E-03 |
| ION TRANSMEMBRANE TRANSPORT                                                                    | 762                 | 14                | ATP6V1C2, A   | 5.07            | 2.03E-06 | 3.53E-03 |
| RNA ELONGATION                                                                                 | 762                 | 14                | POLR2H, POL   | 4.87            | 3.32E-06 | 5.77E-03 |
| PEROXIDASE ACTIVITY                                                                            | 706                 | 11                | MGST3, GPX    | 6.32            | 4.53E-06 | 6.92E-03 |
| OXIDOREDUCTASE ACTIVITY, ACTING ON PEROXIDE AS ACCEPTOR                                        | 706                 | 11                | MGST3, GPX    | 6.32            | 4.53E-06 | 6.92E-03 |
| COFACTOR METABOLIC PROCESS                                                                     | 762                 | 29                | LDHB, TSPO,   | 2.64            | 4.45E-06 | 7.75E-03 |
