# Supplementary material
Source: PubMed Central journal article supplement (PMC6857804)
Supplement: NIHMS1057272-supplement-Table_S17a.pdf [file NIHMS1057272-supplement-Table_S17a.pdf]

**Supplementary Table 17 List of PCR primer sequences.**

**Supplementary Table 17a qRT-PCR primers.**

| <b>Gene Symbol</b> | <b>Forward</b>         | <b>Reverse</b>         |
|--------------------|------------------------|------------------------|
| CCL18              | CTCCTGTGCACAAGTTGGTA   | GTGGAATCTGCCAGGAGGTA   |
| CCL4               | AAGCTCTGCGTGACTGTCCTGT | AAGCTTCCTCGCGGTGTAAGA  |
| CD1C               | TCATGGCTGGGACAGTGAAT   | CCCGCTTTCACCTGTACTTC   |
| CD1E               | CATGGAAACTTCAGCAAGCA   | CAAGCTGAAATTGACCAGCA   |
| CXCR4              | GAGGCCCTAGCTTTCTTCCA   | GAATGTCCACCTCGCTTTCC   |
| EGR3               | GCGTTGGACAGCAATCTCTT   | GAATGGAGCCCATGTCGTTG   |
| GAPDH              | GAAGGTGAAGGTCGGAGTCAAC | CAGAGTTAAAAGCAGCCCTGGT |
| HLA-F              | CGTACGACGGCAAGGATTAC   | TCCTCTGCCTCATAGAAGCG   |
| IFI30              | CGTCAATGGGAAACCCTTGG   | GCTTCTGCCCTGGTACAAC    |
| IL18R1             | TTCTGAAGTGGAAAGCCGAT   | AGACTCGGAAAGAACAGGCA   |
| IL18RAP            | GTCACCTCAGCGTGATCTTCG  | GGAGCACCCTCCTCTCTTT    |
| IL1RL2             | GGCTTTGGCCTGTTGAAGAA   | GGCACCATGCTTCTGTTTGA   |
| IL1RN              | GCCTCATGCTCTGTTCTTGG   | GCTTTCTGTTCTCGCTCAGG   |
| IL6                | AATGAGGAGACTTGCCTGGT   | GCAGGAACTGGATCAGGACT   |
| IRF4               | ACACCATGACAACGCCTTAC   | CGTCATGGGACATTGGTACG   |
| MYO1G              | GTGATGGCAAGGACACAGTC   | ACTGCTCGAAACTGTTGACG   |
| PDCD1              | GCTTCCGTGTACACAACCTG   | GCAGGCTCTCTTTGATCTGC   |
| TICAM1             | CAGCCTACTCAGCCTACCTC   | CAAATGACATGTGGCTCCCA   |
