# Supplementary material
Source: PubMed Central journal article supplement (PMC6857804)
Supplement: NIHMS1057272-supplement-Table_S17b.pdf [file NIHMS1057272-supplement-Table_S17b.pdf]

**Supplementary Table 17 PCR primers.**

**Supplementary Table 17b Genomic qPCR primers.**

| <b>Gene Symbol</b> | <b>Forward</b>       | <b>Reverse</b>       |
|--------------------|----------------------|----------------------|
| CDKN2A             | GGCTGGCTGGTCACCAGA   | CGCCCGCACCTCCTCTAC   |
|                    | GGCAAGGAGGACCATAATTC | GGACCAAGACTTCGCTGAC  |
| FGF1               | CTGCGTCCTTCTGTTTCCAG | CCTGTTCTTGTACGGTGCTG |
|                    | CCTGAGTGGTTTCTGGGAT  | CAGTGTCAGCGGTGGTTAAG |
|                    | AGCTCCAAGTGGAGTCTGTC | GTGTGTTGGACTGTGGCTTT |
| IL15               | GGGCACACATCAGGCATATC | AACTGAACAACACGCACCTC |
|                    | TCTCCCTGGTCTTGTGGGG  | ATGATGAAAGCGGCTCACAC |
|                    | CTGAGTTTGTGGTGGTGCAA | CAGTAGGAGCCCACCTTGAA |
| TERT               | TTCAAGGCTGGGAGGAACAT | TGACACTTCAGCCGCAAGAC |
