# Supplementary material
Source: PubMed Central journal article supplement (PMC6857804)

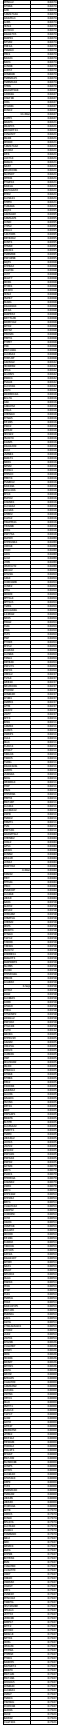

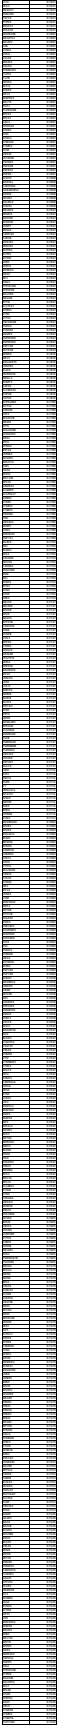

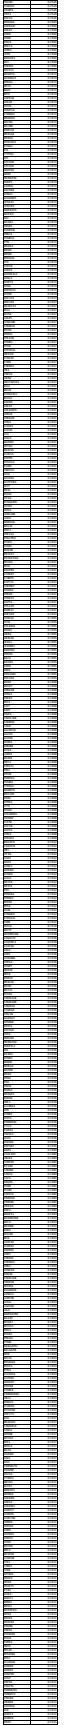

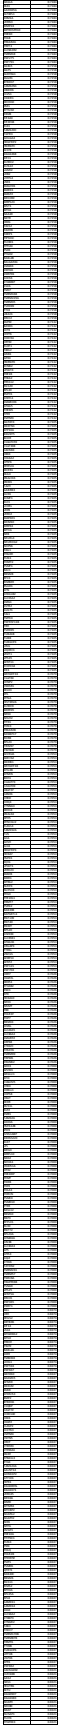

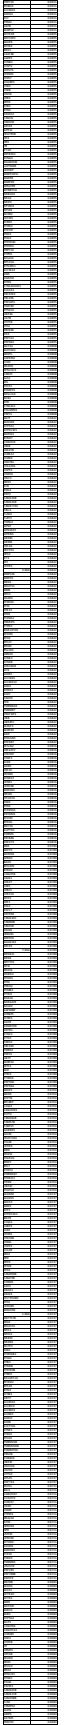

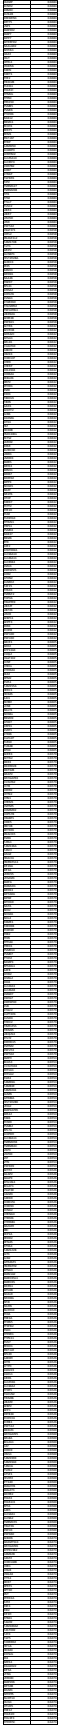

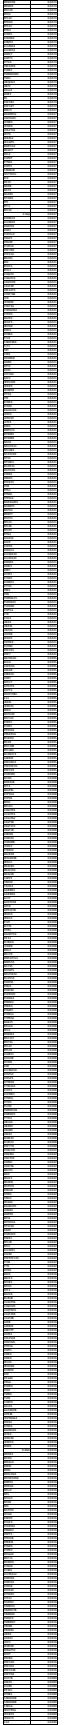



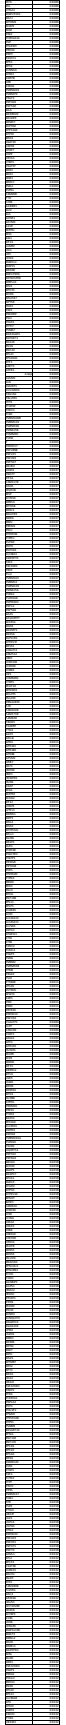

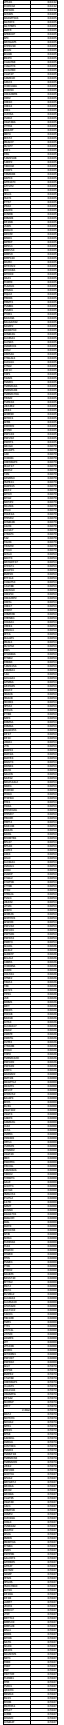

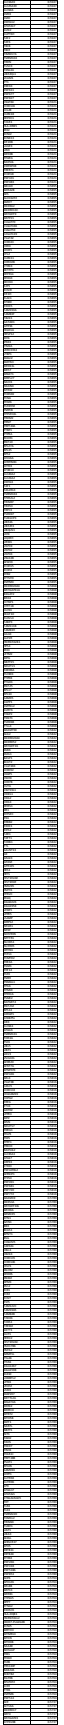

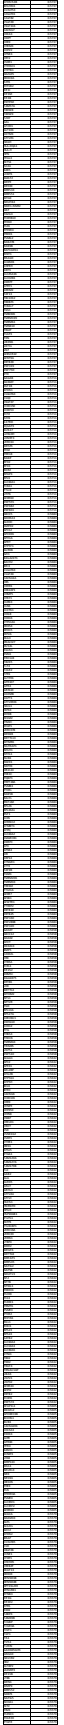

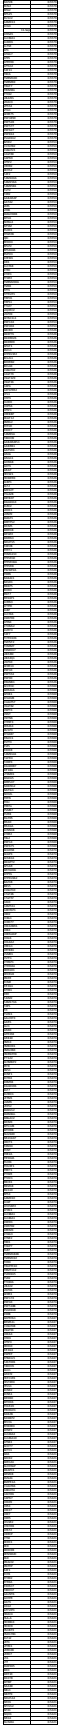

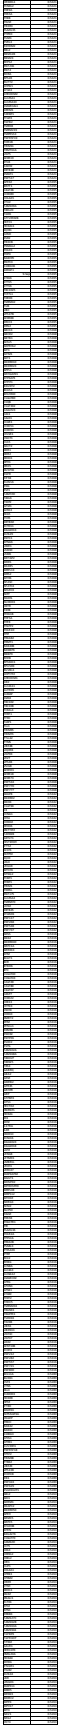

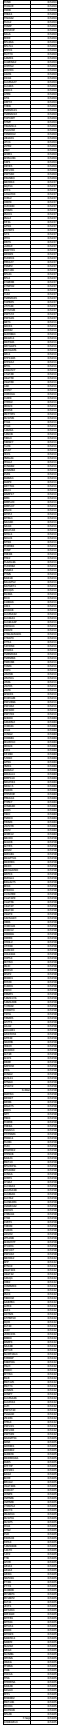

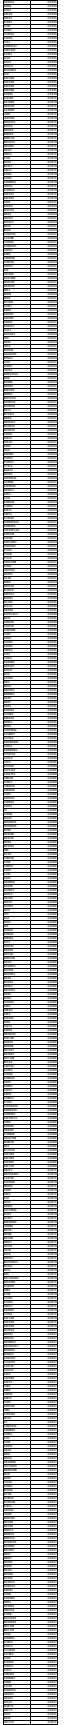



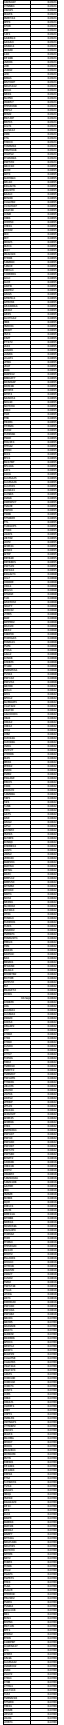

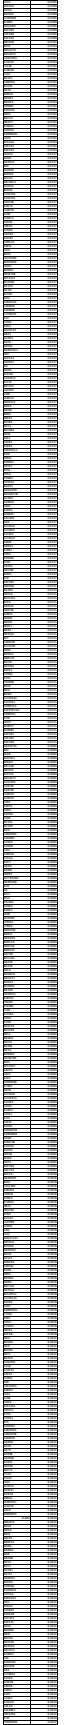

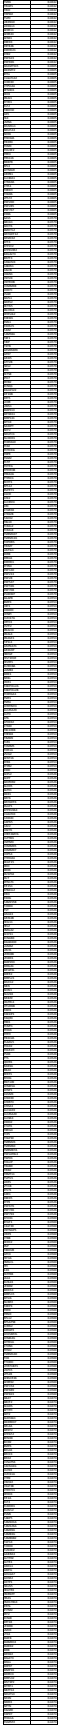

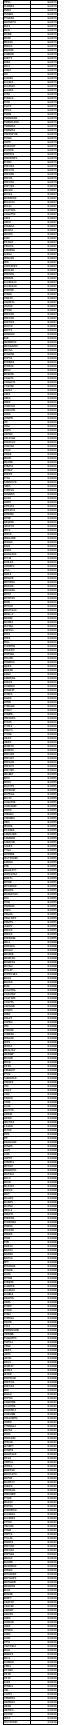

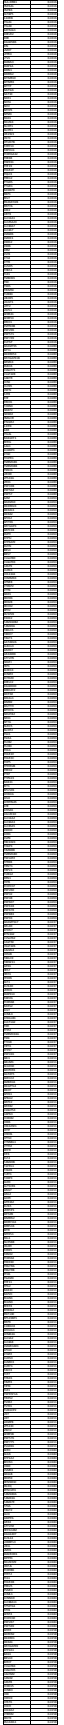

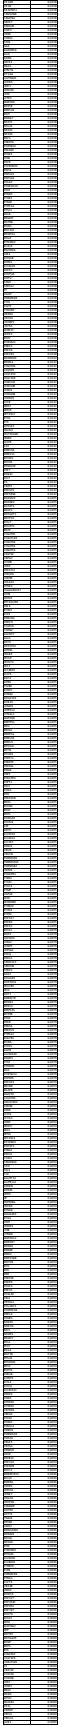

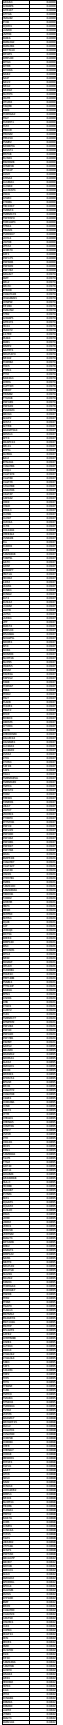

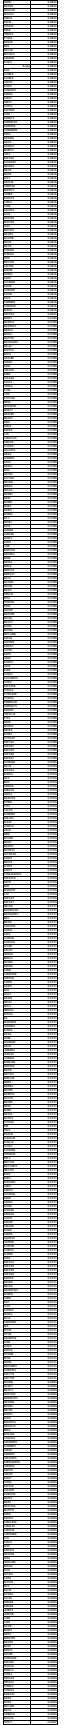



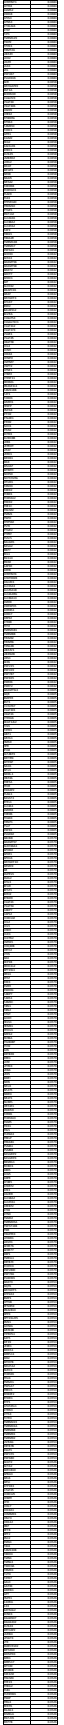

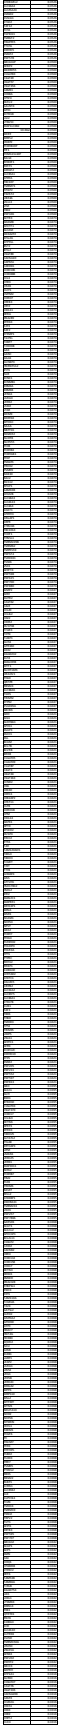

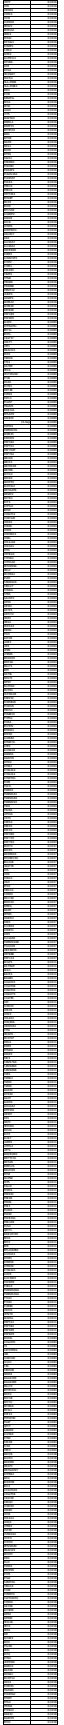

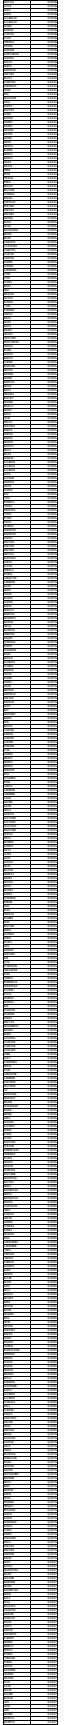

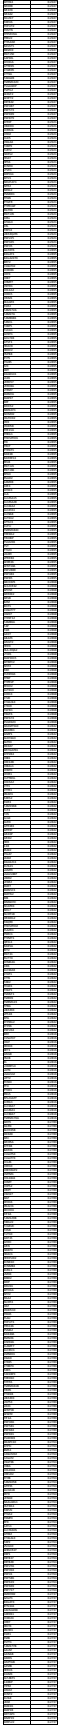

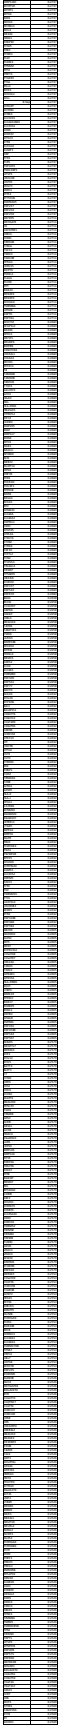

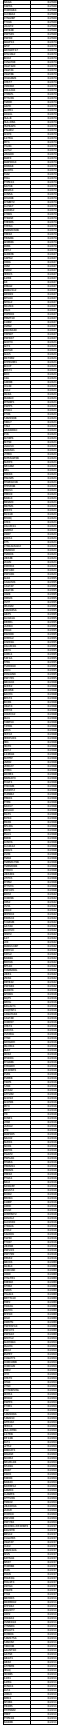

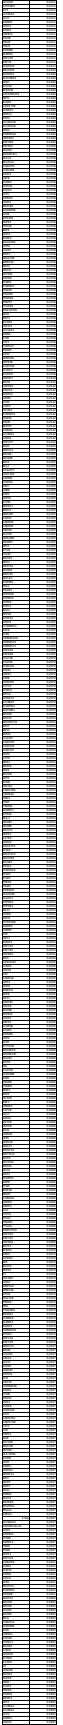



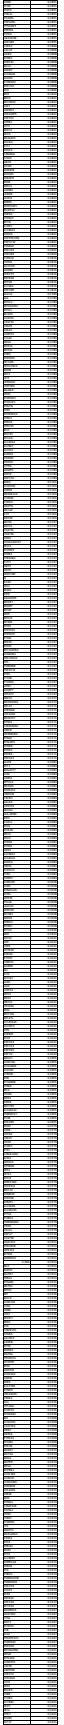

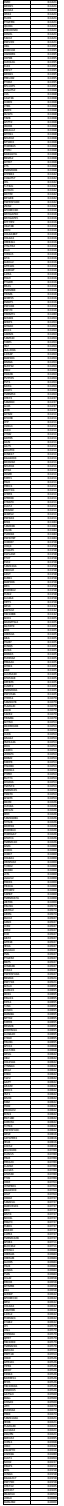

Supplement: NIHMS1057272-supplement-Table_S08a.pdf [file NIHMS1057272-supplement-Table_S08a.pdf]
